1           **Base-resolution mapping reveals distinct m<sup>1</sup>A methylome in**  
2           **nuclear- and mitochondrial-encoded transcripts**

3 Xiaoyu Li<sup>1,#</sup>, Xushen Xiong<sup>1,2,#</sup>, Meiling Zhang<sup>1,#</sup>, Kun Wang<sup>1,#</sup>, Ying Chen<sup>3,#</sup>, Jun  
4 Zhou<sup>4</sup>, Yuanhui Mao<sup>4</sup>, Jia Lv<sup>5</sup>, Danyang Yi<sup>1</sup>, Xiao-Wei Chen<sup>5,6</sup>, Chu Wang<sup>3,6</sup>, Shu-  
5 Bing Qian<sup>4</sup> & Chengqi Yi<sup>1,3,6,\*</sup>

6 *<sup>1</sup>State Key Laboratory of Protein and Plant Gene Research, School of Life Sciences, Peking*  
7 *University, Beijing 100871, China.*

8 *<sup>2</sup>Academy for Advanced Interdisciplinary Studies, Peking University, Beijing 100871, PR China*

9 *<sup>3</sup>Department of Chemical Biology and Synthetic and Functional Biomolecules Center, College of*  
10 *Chemistry and Molecular Engineering, Peking University, Beijing 100871, China.*

11 *<sup>4</sup>Division of Nutritional Sciences, Cornell University, Ithaca, New York 14853, USA*

12 *<sup>5</sup>Institute of Molecular Medicine, Peking University, Beijing, China*

13 *<sup>6</sup>Peking-Tsinghua Center for Life Sciences, Peking University, Beijing, China.*

14 *#These authors contributed equally to this work.*

15 *\*Correspondence: [chengqi.yi@pku.edu.cn](mailto:chengqi.yi@pku.edu.cn) (C. Y.)*

16  
17

## 1 **SUMMARY**

2 Gene expression can be post-transcriptionally regulated via dynamic and reversible  
3 RNA modifications. *N*<sup>1</sup>-methyladenosine (m<sup>1</sup>A) is a recently identified mRNA  
4 modification; however, little is known about its precise location, regulation and  
5 function. Here, we develop a base-resolution m<sup>1</sup>A profiling method, based on m<sup>1</sup>A-  
6 induced misincorporation during reverse transcription, and report distinct classes of  
7 m<sup>1</sup>A methylome in the human transcriptome. m<sup>1</sup>A in 5'-UTR, particularly those at the  
8 first nucleotide of mRNA, associate with increased translation efficiency. A different  
9 subset of m<sup>1</sup>A exhibit a GUUCRA tRNA-like motif, are evenly distributed in the  
10 transcriptome and are dependent on the methyltransferase TRMT6/61A. Additionally,  
11 we show for the first time that m<sup>1</sup>A is prevalent in the mitochondrial-encoded  
12 transcripts. Manipulation of m<sup>1</sup>A level via TRMT61B, a mitochondria-localizing m<sup>1</sup>A  
13 methyltransferase, demonstrates that m<sup>1</sup>A in mitochondrial mRNA interferes with  
14 translation. Collectively, our approaches reveal distinct classes of m<sup>1</sup>A methylome  
15 and provide a resource for functional studies of m<sup>1</sup>A-mediated epitranscriptomic  
16 regulation.  
17

## 1 INTRODUCTION

2 More than 100 different types of post-transcriptional modifications have been  
3 identified so far (Machnicka et al., 2013). Recent breakthroughs in sequencing  
4 technologies have greatly advanced our understanding to the location, regulation,  
5 and function of RNA modifications in the transcriptome (Frye et al., 2016; Fu et al.,  
6 2014; Helm and Motorin, 2017; Li et al., 2016b), leading to the emerging field of  
7 epitranscriptomics (He, 2010; Saletore et al., 2012). One such example is *N*<sup>1</sup>-  
8 methyladenosine (m<sup>1</sup>A), a prevalent modification in non-coding RNA (ncRNA) and  
9 messenger RNA (mRNA) (Anderson and Droogmans, 2005; Roundtree et al., 2017).  
10 m<sup>1</sup>A was first documented more than 50 years ago (Dunn, 1961); later it was found  
11 to be a primordial RNA modification across the three major phylogenetic domains  
12 (Machnicka et al., 2013). In human cells, m<sup>1</sup>A is found at position 9 and 58 of human  
13 mitochondrial and cytoplasmic tRNAs, catalyzed by TRMT10C, TRMT61B and  
14 TRMT6/61A, respectively (Chujo and Suzuki, 2012; Ozanick et al., 2005; Vilaro et  
15 al., 2012); it is also present at position 1322 of 28S rRNA, catalyzed by NML (Waku  
16 et al., 2016). Its unique physicochemical property has also endowed m<sup>1</sup>A with pivotal  
17 roles in maintaining the proper structure and function of these ncRNAs (Roundtree et  
18 al., 2017). m<sup>1</sup>A in tRNA has also been systematically evaluated by microarray and  
19 sequencing (Cozen et al., 2015; Saikia et al., 2010; Zheng et al., 2015); more  
20 recently, m<sup>1</sup>A58 is shown to be reversible by ALKBH1, demonstrating an example of  
21 reversible tRNA modification in translation regulation (Liu et al., 2016). In addition to  
22 ncRNAs, m<sup>1</sup>A is also found to be a dynamic modification in mammalian mRNA, with

1 strong enrichment in the 5'-UTR (Dominissini et al., 2016; Li et al., 2016a).

2 Despite such rapid progress, a high-resolution profile of the mammalian m<sup>1</sup>A  
3 methylome is still lacking, significantly limiting our understanding and functional  
4 characterization of this newly discovered mRNA modification. Previous m<sup>1</sup>A profiling  
5 technologies have a resolution of about tens of nucleotides to several hundred  
6 nucleotides, primarily determined by the size of RNA fragments in these experiments  
7 (Dominissini et al., 2016; Li et al., 2016a). In addition, the methyltransferase(s) and  
8 functional consequence of mRNA m<sup>1</sup>A modification is poorly understood. Hence,  
9 except for a handful positions in rRNA and tRNA, little is known about the precise  
10 location, regulation and function of m<sup>1</sup>A in the human transcriptome.

11 Here, we report a base-resolution method to profile m<sup>1</sup>A in the human  
12 transcriptome. Our method is based on m<sup>1</sup>A-induced misincorporation during reverse  
13 transcription and reveals distinct classes of m<sup>1</sup>A methylome: a major group of m<sup>1</sup>A  
14 sites that are enriched in 5'-UTR, a small subset of GUUCRA("R" denotes a purine)-  
15 tRNA like m<sup>1</sup>A sites with relatively even distribution in the transcriptome, and  
16 prevalent m<sup>1</sup>A modification in the CDS of 10/13 mitochondrial(mt)-encoded  
17 transcripts. m<sup>1</sup>A sites in the 5'-UTR, particularly those located at the first nucleotide  
18 of mRNA transcripts (or "cap+1" position), are associated with increased translation  
19 efficiency. In contrast, m<sup>1</sup>A in the CDS of mt-mRNA inhibits translation. Collectively,  
20 our approaches reveal distinct classes of base-resolution m<sup>1</sup>A methylome in the  
21 nuclear- and mitochondrial-encoded transcripts, and provide an in-depth resource  
22 towards elucidating the functions of m<sup>1</sup>A methylation in mRNA.

## 1 **RESULTS**

### 2 **m<sup>1</sup>A-induced misincorporation during reverse transcription**

3 Because m<sup>1</sup>A can cause both truncation and misincorporation during cDNA  
4 synthesis (Hauenschild et al., 2015; Zubradt et al., 2017), we first established the  
5 truncation and mutation profiles of different reverse transcriptases (RTases). We  
6 systematically compared the performance of several commercially available RTases  
7 (including AMV, SuperScript II, SuperScript III and TGIRT) under different conditions  
8 (Figure S1). We found that m<sup>1</sup>A can precisely induce misincorporation at the site of  
9 modification, while m<sup>1</sup>A-induced truncation is less accurate and can occur to the  
10 neighboring nucleotides. In addition, the truncation profile could be complicated by  
11 RNA secondary structures and the fragmentation process needed for library  
12 preparation. We concluded that the mutation profile contains a higher signal/noise  
13 ratio and is more precise in detecting the exact position of m<sup>1</sup>A. Among the RTases  
14 we tested, TGIRT demonstrated excellent read-through efficiency and relatively high  
15 mutation frequency at the site of m<sup>1</sup>A (Figure S1B), consistent with the recent DMS-  
16 MaPseq and DM-tRNA-seq results (Zheng et al., 2015; Zubradt et al., 2017).  
17 Moreover, we employed a ligation-based strand-specific library preparation protocol  
18 (Van Nostrand et al., 2016), which ensures that the m<sup>1</sup>A-induced mutation is within  
19 the sequenced fragment (see Method Details).

20 Because we only observed ~40-50% mutation rate at m<sup>1</sup>A1322 in 28S rRNA  
21 (Figure S2A), which is known to be of high modification level, we further examined

1 the quantitative capability of TGIRT. We chemically synthesized two model RNA  
2 sequences with site-specific m<sup>1</sup>A modification. For m<sup>1</sup>A sites with ~97-98%  
3 modification level (measured by quantitative mass spectrometry) (Figure S2B), we  
4 consistently observed ~66-75% misincorporation (Figure S2C); the mismatch rate  
5 dropped non-linearly when we gradually lowered the modification level. Even with  
6 ~50% m<sup>1</sup>A modification, a mismatch rate of only ~9-10% was observed (Figure  
7 S2C). These findings suggest that the observed mutation rate is an underestimation  
8 of the actual modification level. While the TGIRT-based procedure can still detect  
9 m<sup>1</sup>A sites of high modification level, sequencing RNA directly with TGIRT may not be  
10 able to capture the m<sup>1</sup>A sites with averaging modification level in the transcriptome  
11 (~20% as previously measured by microarray) (Dominissini et al., 2016). To improve  
12 the sensitivity for transcriptome-wide m<sup>1</sup>A detection, we decided to couple the  
13 TGIRT-based procedure with a pre-enrichment step and an additional *in vitro*  
14 demethylation step (Figure 1A). We first show that *in vitro* demethylation reaction  
15 mediated by the demethylase AlkB is more efficient than the Dimroth reaction,  
16 demonstrating ~98% and ~80% efficiency (Figure S2D), respectively. In addition, the  
17 extended treatment of RNA in alkaline condition during the Dimroth reaction leads to  
18 excessive RNA degradation (Figure S2E), potentially causing loss of RNA molecules.  
19 By integrating the enrichment and demethylation steps, we successfully maximized  
20 the dynamic range of m<sup>1</sup>A-induced mutational signature for m<sup>1</sup>A1322 in 28S rRNA  
21 (~47%, ~95% and ~0.9% in the input, (-) and (+) demethylase samples,  
22 respectively), allowing sensitive and confident m<sup>1</sup>A detection (Figure 1B). We termed

1 our approach misincorporation-assisted profiling of m<sup>1</sup>A, or m<sup>1</sup>A-MAP.

2

### 3 **m<sup>1</sup>A-MAP detects known and novel m<sup>1</sup>A in tRNA**

4 We next applied m<sup>1</sup>A-MAP to tRNA. In mammals, m<sup>1</sup>A can occur at position 9, 14  
5 and 58 of tRNA (Anderson and Droogmans, 2005). m<sup>1</sup>A<sub>14</sub> has been reported only in  
6 tRNA<sup>Phe</sup> and is considered to be very rare (Machnicka et al., 2013); we did not  
7 observe any m<sup>1</sup>A modification at position 14 for cytosolic tRNAs in HEK293T cells  
8 (Table S1). m<sup>1</sup>A<sub>58</sub> is conserved across the three domains of life; previous tRNA  
9 microarray and sequencing data has reported hypomodified tRNAs at this position  
10 (Cozen et al., 2015; Saikia et al., 2010; Zheng et al., 2015). Our results confirmed  
11 that m<sup>1</sup>A<sub>58</sub> is globally present in the cytosolic tRNAs (Figure 1C and S2F). The m<sup>1</sup>A<sub>9</sub>  
12 modification exists only in archaea tRNA or mammalian mitochondrial tRNA;  
13 interestingly, we observed a novel m<sup>1</sup>A<sub>9</sub> site for cytosolic tRNA<sup>Asp(GUC)</sup>, representing  
14 the first cytosolic tRNA with m<sup>1</sup>A modification at position 9 (Figure 1D). Collectively,  
15 these observations suggest that m<sup>1</sup>A-MAP is highly sensitive in detecting m<sup>1</sup>A at  
16 single-base resolution.

17

### 18 **Single-nucleotide resolution m<sup>1</sup>A methylome in the transcriptome**

19 We then sought to detect transcriptome-wide m<sup>1</sup>A methylome at single-base  
20 resolution. We defined two parameters to evaluate the m<sup>1</sup>A-MAP data: difference of  
21 mismatch rate and fold change of mismatch rate (see Method Details). To minimize

1 the effect of mismatch rate variation during m<sup>1</sup>A identification, we rigorously tested  
2 our threshold and identified 740 m<sup>1</sup>A sites in the 293T transcriptome (Table S1-3). To  
3 evaluate potential false positives caused by m<sup>1</sup>A-independent mismatch, we  
4 performed the opposite calculation and retrieved only 17 such sites (see Method  
5 Details). Moreover, we also systematically evaluated the mutation pattern of the  
6 identified m<sup>1</sup>A sites in the transcriptome. Using m<sup>1</sup>A sites in tRNA as positive  
7 controls, we found that m<sup>1</sup>A-induced mutation is more strongly influenced by its 5'-  
8 nucleotide than the 3'-nucleotide; importantly, a similar sequence-dependent feature  
9 is also observed for m<sup>1</sup>A sites in mRNA (Figure 2A and S3A). Therefore, we  
10 conclude that our strict threshold allowed us to confidently detect transcriptome-wide  
11 m<sup>1</sup>A sites at single-nucleotide resolution.

12 Out of the 740 m<sup>1</sup>A modifications in the transcriptome (Figure S3B), 473 sites are  
13 located in mRNA and lncRNA molecules (Figure S3C and Table S2). Majority of  
14 these sites are within the 5'-UTR (Figure 2B and 2C), consistent with the previous  
15 finding (Dominissini et al., 2016; Li et al., 2016a). Our single-base profile also reveals  
16 new features of the m<sup>1</sup>A methylome: for instance, we found 24 m<sup>1</sup>A methylation sites  
17 that are present exactly at the first nucleotide of the 5' end of the transcripts (Figure  
18 2D and Table S2). Because the first two nucleotides of the 5' end of mRNA are  
19 known to contain ribose methylation, it is likely that these transcripts have an m<sup>1</sup>A<sub>m</sub>  
20 modification at the cap+1 site. We also found 3 additional transcripts with m<sup>1</sup>A  
21 methylation at the second nucleotide, potentially giving rise to m<sup>1</sup>A<sub>m</sub> at cap+2 as  
22 well. For m<sup>1</sup>A located in CDS, while we did not observe a tendency for codon



1 position, we did notice a mild preference for codon types, with Arg(CGA) being the  
2 most frequently modified by m<sup>1</sup>A (Figure S3D). No m<sup>1</sup>A is detected for AUG start  
3 codons. Representative examples of m<sup>1</sup>A sites identified from different mRNA  
4 regions are shown (Figure 2D-F and S3E). Two additional sites of high mutation,  
5 which are insensitive to the demethylase treatment, also appeared in the *WDR18*  
6 and *BRD2* examples (Figure 2D and 2E). By referring to the SNP database, we  
7 found that these two positions belong to annotated SNP sites, demonstrating the  
8 robustness of our approach in distinguishing true m<sup>1</sup>A sites from false signals (SNP,  
9 other modifications and etc.).

10 Because m<sup>1</sup>A is enriched in the 5'-UTR, we examined whether m<sup>1</sup>A could be  
11 involved in translation regulation. We performed ribosome profiling and compared  
12 the translation efficiency for transcripts with or without m<sup>1</sup>A. We found that m<sup>1</sup>A within  
13 the 5'-UTR positively correlates with the translation efficiency of mRNA (Figure 2G).  
14 This positive correlation is even stronger for m<sup>1</sup>A at the cap+1 position, but is not  
15 observed for m<sup>1</sup>A located in CDS nor 3'-UTR. This observation hints that m<sup>1</sup>A within  
16 different regions of mRNA may have different biological functions.

17

### 18 **A subset of m<sup>1</sup>A sites demonstrate a GUUCRA consensus motif**

19 An unbiased motif detection using DREME revealed that a subset of m<sup>1</sup>A (53 sites)  
20 are found within a strong GUUCRA sequence (Figure 3A). Interestingly, these sites  
21 demonstrate a very different distribution pattern: instead of being enriched in the 5'-  
22 UTR, these sites are evenly distributed in the transcriptome (Figure 3B). Because

1 this motif is reminiscent of the m<sup>1</sup>A-containing TΨC loop in tRNA, we hypothesized  
2 that the tRNA methyltransferase complex TRMT6/61A could be responsible for these  
3 mRNA m<sup>1</sup>A sites. We first performed direct m<sup>1</sup>A sequencing (without antibody  
4 enrichment) to RNA population below 200nt. We found that the m<sup>1</sup>A58 sites within  
5 the GUUCNA motif experienced a global decrease of mutation rate in the  
6 TRMT6/61A knock-down sample, which was not observed for m<sup>1</sup>A58 sites that do  
7 not confine to the motif (Figure 3C, S4A and S4B). This result suggests that  
8 TRMT6/61A-mediated m<sup>1</sup>A methylation is highly sequence-specific, consistent with  
9 evidence from crystal structures (Finer-Moore et al., 2015). We then analyzed the  
10 secondary structure for the 53 mRNA m<sup>1</sup>A sites, and found highly conserved  
11 structural features compared to the T-loop of tRNA (Figure S4C and S4D). We also  
12 picked 3 m<sup>1</sup>A sites (in CDS, 3'-UTR and lncRNA, respectively) and examined their  
13 response after TRMT6/61A knock-down (Figure 3D). Our locus-specific approach  
14 (see Method Details), which enabled us to interrogate these sites with high  
15 sequencing depth, unambiguously demonstrated a decrease in mismatch rate after  
16 TRMT6/61A knock-down (Figure 3D). As a comparison, a non-motif m<sup>1</sup>A site located  
17 in a different structural context demonstrated an unaltered modification status  
18 (Figure 3E). Taken together, these observations suggest that in addition to tRNA,  
19 TRMT6/61A is also responsible for a subset of m<sup>1</sup>A sites in mRNA.

## 21 **Distinct m<sup>1</sup>A methylome in the mitochondrial transcriptome**

22 In addition to the nuclear-encoded transcripts, we also detected prevalent m<sup>1</sup>A

1 modification in the mitochondrial (mt) transcriptome. mt-tRNAs are known to contain  
2 m<sup>1</sup>A at position 9 and 58 (Suzuki et al., 2011), catalyzed by TRMT10C and  
3 TRMT61B (Chujo and Suzuki, 2012; Vilardo et al., 2012) , respectively. m<sup>1</sup>A-MAP  
4 showed that all the 14 mt-tRNAs bearing an adenosine residue at position 9 are m<sup>1</sup>A  
5 modified; for position 58, m<sup>1</sup>A was detected for the 3 known and 2 novel mt-tRNA  
6 molecules (Figure 4 and Table S3). For mt-rRNA, the only known m<sup>1</sup>A site is at  
7 position 947 of 16S rRNA (Bar-Yaacov et al., 2016). Interestingly, we additionally  
8 detected 7 and 10 novel m<sup>1</sup>A sites on 16S and 12S mt-rRNA, respectively (Figure 4  
9 and Table S3). This is very different from cytosolic rRNA, where there is only one  
10 m<sup>1</sup>A site in 28S rRNA (m<sup>1</sup>A1322). Considering the length of these rRNA species, mt-  
11 rRNAs are much more heavily modified by m<sup>1</sup>A.

12 In human mitochondria, mRNAs are transcribed from the heavy and light strands  
13 as polycistronic units (Falkenberg et al., 2007; Mercer et al., 2011). The processed  
14 mt-mRNAs lack a cap at the 5' end and contain no or short untranslated regions  
15 (Richter-Dennerlein et al., 2015; Rorbach and Minczuk, 2012; Temperley et al.,  
16 2010). We identified 22 m<sup>1</sup>A sites from 10/13 mitochondrial genes, in which 21 are  
17 residing in CDS and 1 is located in the 3'-UTR (Figure 4). This is distinct to the m<sup>1</sup>A  
18 methylome in the nuclear-encoded transcripts, where m<sup>1</sup>A is enriched in the 5'-UTR.  
19 In addition, no preference for codon types was observed, yet m<sup>1</sup>A appears to be  
20 more likely present at the third position of a codon in the CDS of mt-mRNA (Figure  
21 S5A). Moreover, we also identified 25 m<sup>1</sup>A sites within the intergenic spacers. 24/25  
22 m<sup>1</sup>A sites are in the light strand (Figure 4B); some of these m<sup>1</sup>A sites could be within

1 the 3'-UTR of *MT-ND6*, for which there is no current consensus of its 3' end  
2 (Slomovic et al., 2005).

3

#### 4 **m<sup>1</sup>A in mt-mRNA interferes with mitochondrial translation**

5 We next sought to examine the biological consequence of m<sup>1</sup>A in the mt-mRNAs.

6 Translation requires accurate base pairing between mRNA codons and the cognate  
7 tRNAs; however, m<sup>1</sup>A is known to block the canonical A:U base pairing. These facts

8 prompted us to hypothesize that m<sup>1</sup>A in mt-mRNA, which are primarily located in

9 CDS, could interfere with translation in mitochondria. We first integrated published

10 mitochondria ribosome profiling data with m<sup>1</sup>A-MAP identified m<sup>1</sup>A methylome in

11 mitochondria (Rooijers et al., 2013). We found a strong signal of mitochondrial

12 ribosome stalling at the m<sup>1</sup>A site on *MT-ND5* (Figure 5A and S5B), whose

13 modification level is the highest among all m<sup>1</sup>A sites in mt-mRNA. Due to the

14 difficulty of an *in vitro* mitochondrial translation system (Smits et al., 2010), we

15 sought to enzymatically manipulate the modification level of the mt-mRNAs. Two

16 enzymes are known to introduce m<sup>1</sup>A in human mitochondria: TRMT10C generates

17 m<sup>1</sup>A as well as m<sup>1</sup>G at position 9 in mitochondrial tRNAs, while TRMT61B is

18 responsible for m<sup>1</sup>A at position 58 in some mitochondrial tRNAs and position 947 in

19 16S mt-rRNA (Bar-Yaacov et al., 2016; Chujo and Suzuki, 2012; Vilaro et al., 2012).

20 Because TRMT10C is a subunit of the mitochondrial RNase P complex and is not

21 specific for adenosine, we focused on TRMT61B. We utilized a qPCR-based assay

22 to quantitatively evaluate the modification status of the m<sup>1</sup>A sites in mt-mRNAs (see

1 Method Details); we found that while TRMT61B knock-down mildly reduced the m<sup>1</sup>A  
2 level (Figure S5C and S5D), TRMT61B overexpression greatly increased the m<sup>1</sup>A  
3 modification level of several mt-mRNAs (Figure 5B and S5D). This observation  
4 suggests that in addition to mt-tRNA and mt-rRNA, TRMT61B could also target mt-  
5 mRNA. Because of the high efficiency of TRMT61B overexpression in increasing the  
6 m<sup>1</sup>A level, we used mass spectrometry to quantitatively measure the mitochondrial  
7 protein level upon TRMT61B overexpression (Figure S5E). Indeed, TRMT61B  
8 overexpression led to a reduced protein level for *MT-CO2* and *MT-CO3* (Figure 5C  
9 and S5F), which are targets of TRMT61B. We further confirmed this observation for  
10 the MT-CO2 protein using Western blot (Figure 5D). Collectively, these results  
11 suggest that m<sup>1</sup>A in mt-mRNA interferes with translation in mitochondria.

12

## 13 **DISCUSSION**

14 In this study, we developed a single-nucleotide resolution method for transcriptome-  
15 wide identification of m<sup>1</sup>A in human cells. m<sup>1</sup>A-MAP utilizes the m<sup>1</sup>A-induced  
16 misincorporation in cDNA synthesis to achieve base-resolution m<sup>1</sup>A detection. This  
17 enabled us to identify m<sup>1</sup>A modification not only at the mRNA cap, but also within a  
18 GUUCRA tRNA-like sequence motif. In principle, such misincorporation-dependent  
19 strategy could be applied to estimate the modification status of RNA sites of interest.  
20 However, our results in both rRNA and model RNA sequences strongly suggest that  
21 such estimation should be done with caution: TGIRT underestimates m<sup>1</sup>A  
22 modification level and m<sup>1</sup>A-induced mismatch decreases in a non-linear fashion as

1 the modification level decreases. Additionally, the sequence context of RNA has also  
2 been reported to affect the mutation rate (Hauenschild et al., 2015; Zubradt et al.,  
3 2017). Hence, while direct sequencing (without enrichment) could still detect m<sup>1</sup>A  
4 sites with high modification level, m<sup>1</sup>A sites with averaging modification level or those  
5 located within a non-optimal context for mismatch induction could be missed.  
6 Therefore, coupling the pre-enrichment step to the mutational signature is necessary  
7 to improve the detection sensitivity. In addition, to achieve high confidence, we  
8 employed an *in vitro* demethylation step, which enabled us to distinguish true m<sup>1</sup>A  
9 sites from false signals (SNP, other modifications, and etc.) in the transcriptome. The  
10 combined use of mutational signature, the pre-enrichment step and the *in vitro*  
11 demethylation step enabled m<sup>1</sup>A-MAP to achieve high sensitivity and confidence.

12 Our study revealed that two known m<sup>1</sup>A modification machinery, TRMT6/61A and  
13 TRMT61B, could work on mRNA as well. The hetero complex TRMT6/61A  
14 recognizes the sequence and structure of the tRNA T-loop and installs an m<sup>1</sup>A at the  
15 58 position (Finer-Moore et al., 2015). Consistent with this knowledge, we found that  
16 the TRMT6/61A-dependent mRNA m<sup>1</sup>A sites are also confined to a hairpin structure  
17 mostly frequently with a 7nt loop, reminiscent of the tRNA T-loop. In contrast, we did  
18 not find an obvious sequence context for the m<sup>1</sup>A in mt-mRNA. In fact, TRMT61B  
19 appears to be a promiscuous enzyme that also modifies mt-tRNA and mt-rRNA; the  
20 substrate specificity and the underlying mechanism of TRMT61B in the human  
21 mitochondria remains to be determined. In addition, the fact that both TRMT6/61A  
22 and TRMT61B are known tRNA modification enzymes also reminds us of the

1 modification machinery for other mRNA modifications. For instance, eukaryotic  $\Psi$   
2 synthases PUS1, PUS7 and TRUB1 can work on both tRNA and mRNA (Carlile et  
3 al., 2014; Li et al., 2015; Lovejoy et al., 2014; Safra et al., 2017; Schwartz et al.,  
4 2014a); yet the modification complex for  $m^6A$ , consisting at least METTL3,  
5 METTL14, WTAP and KIAA1429, appears to be dedicated to mRNA (Bokar et al.,  
6 1997; Liu et al., 2014; Ping et al., 2014; Schwartz et al., 2014b). In the case of  $m^1A$ ,  
7 the enzyme(s) responsible for the majority of the modification sites in mRNA remains  
8 to be identified. It would be interesting to see if such machinery is specific for mRNA  
9 or promiscuous for multiple RNA substrates.

10 Our base-resolution  $m^1A$  profiles reveal distinct  $m^1A$  methylome in the human  
11 transcriptome.  $m^1A$  is enriched in the 5'-UTR; and only 5'-UTR  $m^1A$  sites, but not  
12 those in CDS or 3'-UTR, are correlated with higher translation efficiency. Different  
13 from the  $m^1A$  sites in the nuclear-encoded transcripts,  $m^1A$  in mt-mRNA are primarily  
14 located in CDS and inhibit translation. In addition, we also identified a notable group  
15 of  $m^1A$  methylation adjacent to the mRNA cap, raising the possibility of  $m^1A_m$   
16 modification at the first position of RNA transcripts. A related but different  
17 modification,  $m^6A_m$ , is also known to be present at this position and is recently  
18 reported to improve mRNA stability (Mauer et al., 2017). While  $m^1A$ -MAP could not  
19 discriminate  $m^1A$  from  $m^1A_m$ , neither  $m^6A$  nor  $m^6A_m$  should induce misincorporation  
20 during reverse transcription, nor become sensitive to demethylation by AlkB. Hence,  
21 methylation to the N1 and N6 position of adenosine within the cap should represent  
22 distinct types of modifications.

1 Our results also revealed m<sup>1</sup>A in mt-mRNA for the first time and showed that  
2 such methylation interferes with translation. By manipulating the m<sup>1</sup>A level via  
3 TRMT61B, we monitored the corresponding changes of the mitochondrial protein  
4 level by both quantitative mass spectrometry and Western blot. TRMT61B modifies  
5 both mt-tRNA and mt-rRNA (Bar-Yaacov et al., 2016; Chujo and Suzuki, 2012); and  
6 these m<sup>1</sup>A sites are thought to be beneficial for their functions in translation. Because  
7 m<sup>1</sup>A sites in mt-mRNA have an opposing effect in translation, changes of protein  
8 synthesis level after TRMT61B knock-down could be a mixed result of contrary m<sup>1</sup>A  
9 sites in these different components (rRNA, tRNA and mRNA) of translation.  
10 Conversely, because 16S rRNA and mt-tRNA<sup>Leu(UUR)</sup> are already of high m<sup>1</sup>A level, we  
11 envisioned that TRMT61B overexpression should lead to a greater increase of m<sup>1</sup>A  
12 level in mRNA than in these ncRNAs. In this simplified scenario, we indeed observed  
13 greatly increased modification level for the mt-mRNA and detected reduced protein  
14 level for two mitochondrial proteins, whose mRNA transcripts are m<sup>1</sup>A modified.  
15 While our MS experiments detected the overall protein level, future experiments  
16 measuring the nascent protein level upon TRMT61B overexpression or knock-down  
17 could provide more detailed information regarding protein synthesis. In terms of the  
18 mechanism of m<sup>1</sup>A-mediated translational suppression, multiple possibilities need to  
19 be considered. For instance, due to the presence of a base-pairing interfering  
20 modification in the CDS, m<sup>1</sup>A could serve as a road block for the mitochondrial  
21 ribosome. In fact, recent *in vitro* translation experiments on synthetic RNA  
22 sequences have shown that m<sup>1</sup>A in CDS represses translation; the effect is stronger



1 when m<sup>1</sup>A is at codon position 1 and 2, while m<sup>1</sup>A at the third position also mitigates  
2 translation (You et al., 2017). Thus, not only the density but also the exact position of  
3 m<sup>1</sup>A in mt-mRNA could influence protein synthesis. In addition, microRNA has been  
4 shown to enhance translation in mitochondria (Zhang et al., 2014). We analyzed the  
5 published CLASH results in which microRNA and their direct mRNA targets are  
6 captured (Helwak et al., 2013); interestingly, we found two m<sup>1</sup>A sites that are located  
7 within the experimentally verified targets of microRNA (Figure S5G). In fact, these  
8 m<sup>1</sup>A sites reside exactly within mRNA sequences that form base-pairing with the  
9 seed regions of microRNAs. More m<sup>1</sup>A sites in mt-mRNA were found within the  
10 predicted mt-mRNA targets of the microRNA seed regions (Figure S5H). While both  
11 the speculated mechanisms point to a suppressive role of m<sup>1</sup>A in mitochondria  
12 translation, alternative hypothesis and mechanism should also be tested in future  
13 experiments. Nevertheless, our discovery that m<sup>1</sup>A in mt-mRNA interferes with  
14 translation improves our understanding of translation regulation in human  
15 mitochondria.

16 In summary, our study demonstrated distinct classes of m<sup>1</sup>A methylome in the  
17 nuclear- and mitochondrial-encoded transcripts. Our single-nucleotide resolution m<sup>1</sup>A  
18 technology allowed the comprehensive profiling of m<sup>1</sup>A in the human transcriptome,  
19 providing a reference and resource for future investigations to elucidate the  
20 biological functions and mechanisms of this new epitranscriptomic mark.

21

22 **AUTHOR CONTRIBUTIONS**

23

1 X.L., X.X., and C.Y. conceived the base-resolution method and performed sequencing; Y.C., M.Z., K.W.,  
2 J.L., and D.Y. performed MS analysis and cell biology experiments, under the guidance of C.Y., C.W.,  
3 and X.-W.C. X.L., K.W., and J.Z. performed ribosome profiling and translation experiments. X.X.  
4 designed and performed the bioinformatics analysis, with the help of Y.M. C.Y. and S.-B.Q. supervised  
5 the project. All authors commented on and approved the paper.

6

## 7 **ACKNOWLEDGMENTS**

8 The authors would like to thank Prof. Ying Liu for advice on methyltransferase, Prof. Yongliang Zhao  
9 for sharing antibody, and Drs. Hui Li and Guilan Li for measurements with LC-MS/MS. This work was  
10 supported by the National Basic Research Foundation of China (nos. 2016YFC0900301 and  
11 2014CB964900 to C.Y.), the National Natural Science Foundation of China (nos. 21522201 and  
12 21472009 to C.Y.), US National Institutes of Health (R01 AG042400 and R01 GM122814 to S.-B.Q.)  
13 and HHMI Faculty Scholar (55108556 to S.-B.Q).

14

## 1 REFERENCES

- 2 Anderson, J.T., and Droogmans, L. (2005). Biosynthesis and function of 1-methyladenosine in transfer  
3 RNA. In *Fine-Tuning of RNA Functions by Modification and Editing*, H. Grosjean, ed. (Berlin,  
4 Heidelberg: Springer Berlin Heidelberg), pp. 121-139.
- 5 Bailey, T.L., Boden, M., Buske, F.A., Frith, M., Grant, C.E., Clementi, L., Ren, J., Li, W.W., and Noble,  
6 W.S. (2009). MEME SUITE: tools for motif discovery and searching. *Nucleic Acids Res* *37*, W202-208.
- 7 Bar-Yaacov, D., Frumkin, I., Yashiro, Y., Chujo, T., Ishigami, Y., Chemla, Y., Blumberg, A., Schlesinger,  
8 O., Bieri, P., Greber, B., *et al.* (2016). Mitochondrial 16S rRNA Is Methylated by tRNA  
9 Methyltransferase TRMT61B in All Vertebrates. *PLoS Biol* *14*, e1002557.
- 10 Bokar, J.A., Shambaugh, M.E., Polayes, D., Matera, A.G., and Rottman, F.M. (1997). Purification and  
11 cDNA cloning of the AdoMet-binding subunit of the human mRNA (N6-adenosine)-methyltransferase.  
12 *RNA* *3*, 1233-1247.
- 13 Carlile, T.M., Rojas-Duran, M.F., Zinshteyn, B., Shin, H., Bartoli, K.M., and Gilbert, W.V. (2014).  
14 Pseudouridine profiling reveals regulated mRNA pseudouridylation in yeast and human cells. *Nature*  
15 *515*, 143-146.
- 16 Chujo, T., and Suzuki, T. (2012). Trmt61B is a methyltransferase responsible for 1-methyladenosine at  
17 position 58 of human mitochondrial tRNAs. *RNA* *18*, 2269-2276.
- 18 Cozen, A.E., Quartley, E., Holmes, A.D., Hrabeta-Robinson, E., Phizicky, E.M., and Lowe, T.M. (2015).  
19 ARM-seq: AlkB-facilitated RNA methylation sequencing reveals a complex landscape of modified  
20 tRNA fragments. *Nat Methods* *12*, 879-884.
- 21 Dominissini, D., Nachtergaele, S., Moshitch-Moshkovitz, S., Peer, E., Kol, N., Ben-Haim, M.S., Dai,  
22 Q., Di Segni, A., Salmon-Divon, M., Clark, W.C., *et al.* (2016). The dynamic N(1)-methyladenosine  
23 methylome in eukaryotic messenger RNA. *Nature* *530*, 441-446.
- 24 Dunn, D.B. (1961). The occurrence of 1-methyladenine in ribonucleic acid. *Biochim Biophys Acta* *46*,  
25 198-200.
- 26 Dweep, H., and Gretz, N. (2015). miRWalk2.0: a comprehensive atlas of microRNA-target  
27 interactions. *Nat Methods* *12*, 697.
- 28 Falkenberg, M., Larsson, N.G., and Gustafsson, C.M. (2007). DNA replication and transcription in  
29 mammalian mitochondria. *Annu Rev Biochem* *76*, 679-699.
- 30 Finer-Moore, J., Czudnochowski, N., O'Connell, J.D., 3rd, Wang, A.L., and Stroud, R.M. (2015).  
31 Crystal Structure of the Human tRNA m(1)A58 Methyltransferase-tRNA(3)(Lys) Complex: Refolding of  
32 Substrate tRNA Allows Access to the Methylation Target. *J Mol Biol* *427*, 3862-3876.
- 33 Frye, M., Jaffrey, S.R., Pan, T., Rechavi, G., and Suzuki, T. (2016). RNA modifications: what have we  
34 learned and where are we headed? *Nat Rev Genet* *17*, 365-372.
- 35 Fu, Y., Dominissini, D., Rechavi, G., and He, C. (2014). Gene expression regulation mediated through  
36 reversible m(6)A RNA methylation. *Nat Rev Genet* *15*, 293-306.
- 37 Hauenschild, R., Tserovski, L., Schmid, K., Thuring, K., Winz, M.L., Sharma, S., Entian, K.D.,  
38 Wacheul, L., Lafontaine, D.L., Anderson, J., *et al.* (2015). The reverse transcription signature of N-1-  
39 methyladenosine in RNA-Seq is sequence dependent. *Nucleic Acids Res* *43*, 9950-9964.
- 40 He, C. (2010). Grand challenge commentary: RNA epigenetics? *Nat Chem Biol* *6*, 863-865.
- 41 Helm, M., and Motorin, Y. (2017). Detecting RNA modifications in the epitranscriptome: predict and  
42 validate. *Nat Rev Genet* *18*, 275-291.
- 43 Helwak, A., Kudla, G., Dudnakova, T., and Tollervey, D. (2013). Mapping the human miRNA

- 1 interactome by CLASH reveals frequent noncanonical binding. *Cell* 153, 654-665.
- 2 Huang da, W., Sherman, B.T., and Lempicki, R.A. (2009). Systematic and integrative analysis of large  
3 gene lists using DAVID bioinformatics resources. *Nat Protoc* 4, 44-57.
- 4 Li, H., and Durbin, R. (2009). Fast and accurate short read alignment with Burrows-Wheeler  
5 transform. *Bioinformatics* 25, 1754-1760.
- 6 Li, H., Handsaker, B., Wysoker, A., Fennell, T., Ruan, J., Homer, N., Marth, G., Abecasis, G., Durbin,  
7 R., and Genome Project Data Processing, S. (2009). The Sequence Alignment/Map format and  
8 SAMtools. *Bioinformatics* 25, 2078-2079.
- 9 Li, X., Xiong, X., Wang, K., Wang, L., Shu, X., Ma, S., and Yi, C. (2016a). Transcriptome-wide  
10 mapping reveals reversible and dynamic N(1)-methyladenosine methylome. *Nat Chem Biol* 12, 311-  
11 316.
- 12 Li, X., Xiong, X., and Yi, C. (2016b). Epitranscriptome sequencing technologies: decoding RNA  
13 modifications. *Nat Methods* 14, 23-31.
- 14 Li, X., Zhu, P., Ma, S., Song, J., Bai, J., Sun, F., and Yi, C. (2015). Chemical pulldown reveals dynamic  
15 pseudouridylation of the mammalian transcriptome. *Nat Chem Biol* 11, 592-597.
- 16 Liu, F., Clark, W., Luo, G., Wang, X., Fu, Y., Wei, J., Wang, X., Hao, Z., Dai, Q., Zheng, G., *et al.*  
17 (2016). ALKBH1-Mediated tRNA Demethylation Regulates Translation. *Cell*.
- 18 Liu, J., Yue, Y., Han, D., Wang, X., Fu, Y., Zhang, L., Jia, G., Yu, M., Lu, Z., Deng, X., *et al.* (2014). A  
19 METTL3-METTL14 complex mediates mammalian nuclear RNA N6-adenosine methylation. *Nat*  
20 *Chem Biol* 10, 93-95.
- 21 Lovejoy, A.F., Riordan, D.P., and Brown, P.O. (2014). Transcriptome-wide mapping of pseudouridines:  
22 pseudouridine synthases modify specific mRNAs in *S. cerevisiae*. *PLoS One* 9, e110799.
- 23 Machnicka, M.A., Milanowska, K., Osman Oglou, O., Purta, E., Kurkowska, M., Olchowik, A.,  
24 Januszewski, W., Kalinowski, S., Dunin-Horkawicz, S., Rother, K.M., *et al.* (2013). MODOMICS: a  
25 database of RNA modification pathways--2013 update. *Nucleic Acids Res* 41, D262-267.
- 26 Mauer, J., Luo, X., Blanjoie, A., Jiao, X., Grozhik, A.V., Patil, D.P., Linder, B., Pickering, B.F., Vasseur,  
27 J.J., Chen, Q., *et al.* (2017). Reversible methylation of m6Am in the 5' cap controls mRNA stability.  
28 *Nature* 541, 371-375.
- 29 Mercer, T.R., Neph, S., Dinger, M.E., Crawford, J., Smith, M.A., Shearwood, A.M., Haugen, E.,  
30 Bracken, C.P., Rackham, O., Stamatoyannopoulos, J.A., *et al.* (2011). The human mitochondrial  
31 transcriptome. *Cell* 146, 645-658.
- 32 Ozanick, S., Krecic, A., Andersland, J., and Anderson, J.T. (2005). The bipartite structure of the tRNA  
33 m1A58 methyltransferase from *S. cerevisiae* is conserved in humans. *RNA* 11, 1281-1290.
- 34 Ping, X.L., Sun, B.F., Wang, L., Xiao, W., Yang, X., Wang, W.J., Adhikari, S., Shi, Y., Lv, Y., Chen, Y.S.,  
35 *et al.* (2014). Mammalian WTAP is a regulatory subunit of the RNA N6-methyladenosine  
36 methyltransferase. *Cell Res* 24, 177-189.
- 37 Richter-Dennerlein, R., Dennerlein, S., and Rehling, P. (2015). Integrating mitochondrial translation  
38 into the cellular context. *Nat Rev Mol Cell Biol* 16, 586-592.
- 39 Rooijers, K., Loayza-Puch, F., Nijtmans, L.G., and Agami, R. (2013). Ribosome profiling reveals  
40 features of normal and disease-associated mitochondrial translation. *Nat Commun* 4, 2886.
- 41 Rorbach, J., and Minczuk, M. (2012). The post-transcriptional life of mammalian mitochondrial RNA.  
42 *Biochem J* 444, 357-373.
- 43 Roundtree, I.A., Evans, M.E., Pan, T., and He, C. (2017). Dynamic RNA Modifications in Gene  
44 Expression Regulation. *Cell* 169, 1187-1200.

- 1 Safra, M., Nir, R., Farouq, D., Vainberg Slutskin, I., and Schwartz, S. (2017). TRUB1 is the  
2 predominant pseudouridine synthase acting on mammalian mRNA via a predictable and conserved  
3 code. *Genome Res* 27, 393-406.
- 4 Saikia, M., Fu, Y., Pavon-Eternod, M., He, C., and Pan, T. (2010). Genome-wide analysis of N1-  
5 methyl-adenosine modification in human tRNAs. *RNA* 16, 1317-1327.
- 6 Saletore, Y., Meyer, K., Korlach, J., Vilfan, I.D., Jaffrey, S., and Mason, C.E. (2012). The birth of the  
7 Epitranscriptome: deciphering the function of RNA modifications. *Genome Biol* 13, 175.
- 8 Schwartz, S., Bernstein, D.A., Mumbach, M.R., Jovanovic, M., Herbst, R.H., Leon-Ricardo, B.X.,  
9 Engreitz, J.M., Guttman, M., Satija, R., Lander, E.S., *et al.* (2014a). Transcriptome-wide mapping  
10 reveals widespread dynamic-regulated pseudouridylation of ncRNA and mRNA. *Cell* 159, 148-162.
- 11 Schwartz, S., Mumbach, M.R., Jovanovic, M., Wang, T., Maciag, K., Bushkin, G.G., Mertins, P., Ter-  
12 Ovanesyan, D., Habib, N., Cacchiarelli, D., *et al.* (2014b). Perturbation of m6A writers reveals two  
13 distinct classes of mRNA methylation at internal and 5' sites. *Cell Rep* 8, 284-296.
- 14 Slomovic, S., Laufer, D., Geiger, D., and Schuster, G. (2005). Polyadenylation and degradation of  
15 human mitochondrial RNA: the prokaryotic past leaves its mark. *Mol Cell Biol* 25, 6427-6435.
- 16 Smits, P., Smeitink, J., and van den Heuvel, L. (2010). Mitochondrial translation and beyond:  
17 processes implicated in combined oxidative phosphorylation deficiencies. *J Biomed Biotechnol* 2010,  
18 737385.
- 19 Suzuki, T., Nagao, A., and Suzuki, T. (2011). Human mitochondrial tRNAs: biogenesis, function,  
20 structural aspects, and diseases. *Annu Rev Genet* 45, 299-329.
- 21 Tabb, D.L., McDonald, W.H., and Yates, J.R., 3rd (2002). DTASelect and Contrast: tools for  
22 assembling and comparing protein identifications from shotgun proteomics. *J Proteome Res* 1, 21-26.
- 23 Temperley, R.J., Wydro, M., Lightowlers, R.N., and Chrzanowska-Lightowlers, Z.M. (2010). Human  
24 mitochondrial mRNAs--like members of all families, similar but different. *Biochim Biophys Acta* 1797,  
25 1081-1085.
- 26 Van Nostrand, E.L., Pratt, G.A., Shishkin, A.A., Gelboin-Burkhart, C., Fang, M.Y., Sundararaman, B.,  
27 Blue, S.M., Nguyen, T.B., Surka, C., Elkins, K., *et al.* (2016). Robust transcriptome-wide discovery of  
28 RNA-binding protein binding sites with enhanced CLIP (eCLIP). *Nat Methods* 13, 508-514.
- 29 Vilardo, E., Nachbagauer, C., Buzet, A., Taschner, A., Holzmann, J., and Rossmannith, W. (2012). A  
30 subcomplex of human mitochondrial RNase P is a bifunctional methyltransferase--extensive  
31 moonlighting in mitochondrial tRNA biogenesis. *Nucleic Acids Res* 40, 11583-11593.
- 32 Waku, T., Nakajima, Y., Yokoyama, W., Nomura, N., Kako, K., Kobayashi, A., Shimizu, T., and  
33 Fukamizu, A. (2016). NML-mediated rRNA base methylation links ribosomal subunit formation to cell  
34 proliferation in a p53-dependent manner. *J Cell Sci* 129, 2382-2393.
- 35 Weerapana, E., Wang, C., Simon, G.M., Richter, F., Khare, S., Dillon, M.B., Bachovchin, D.A., Mowen,  
36 K., Baker, D., and Cravatt, B.F. (2010). Quantitative reactivity profiling predicts functional cysteines in  
37 proteomes. *Nature* 468, 790-795.
- 38 Xu, T., Park, S.K., Venable, J.D., Wohlschlegel, J.A., Diedrich, J.K., Cociorva, D., Lu, B., Liao, L.,  
39 Hewel, J., Han, X., *et al.* (2015). ProLuCID: An improved SEQUEST-like algorithm with enhanced  
40 sensitivity and specificity. *J Proteomics* 129, 16-24.
- 41 You, C., Dai, X., and Wang, Y. (2017). Position-dependent effects of regioisomeric methylated adenine  
42 and guanine ribonucleosides on translation. *Nucleic Acids Res*.
- 43 Zhang, X., Zuo, X., Yang, B., Li, Z., Xue, Y., Zhou, Y., Huang, J., Zhao, X., Zhou, J., Yan, Y., *et al.*  
44 (2014). MicroRNA directly enhances mitochondrial translation during muscle differentiation. *Cell* 158,

- 1 607-619.
- 2 Zheng, G., Qin, Y., Clark, W.C., Dai, Q., Yi, C., He, C., Lambowitz, A.M., and Pan, T. (2015). Efficient
- 3 and quantitative high-throughput tRNA sequencing. *Nat Methods* 12, 835-837.
- 4 Zubradt, M., Gupta, P., Persad, S., Lambowitz, A.M., Weissman, J.S., and Rouskin, S. (2017). DMS-
- 5 MaPseq for genome-wide or targeted RNA structure probing in vivo. *Nat Methods* 14, 75-82.
- 6

## 1 **METHOD DETAILS**

### 2 **Cell Culture and Antibodies**

3 HEK293T (ATCC,CRL-11268) was used in this study and maintained in DMEM medium (Gibco)  
4 supplemented with 10% FBS (Gibco) and 1% penicillin/streptomycin (Gibco). Monoclonal mouse  
5 anti-m1A antibody was purchased from MBL (D345-3). Polyclonal rabbit anti-TRMT6 antibody  
6 was purchased from Santa Cruz Biotechnology (sc-271752). MT-CO2 antibody was purchased  
7 from Proteintech Group (55070-1-AP). Monoclonal mouse anti- $\beta$ -Actin antibody was purchased  
8 from CWBiotech (CW0096). Monoclonal mouse anti-GAPDH antibody was purchased from  
9 CWBiotech (CW0100M).The secondary antibodies used are anti-mouse-IgG-HRP (CW0102;  
10 CWBiotech) and anti-rabbit-IgG-HRP (CW0103; CWBiotech).

11

### 12 **RNA isolation**

13 Total RNA was isolated from cells using TRIzol, according to the manufacturer's instructions  
14 (Invitrogen). An additional DNaseI treatment step was performed to avoid DNA contamination.  
15 For polyA<sup>+</sup> RNA isolation, small RNA was depleted first using MEGAclean™ Transcription Clean-  
16 Up Kit (Ambion), followed by two successive rounds of polyA<sup>+</sup> selection using oligo(dT)<sub>25</sub>  
17 dynabeads (Invitrogen). For small RNA isolation, RNA smaller than 200 nt were recovered from  
18 the flow-through fraction in the small RNA depletion step by ethanol precipitation.

19

### 20 **shRNA knock down of TRMT6/61A**

21 The oligoes targeting TRMT6 and TRMT61A were annealed and cloned into the pLKO vector

1 according to the TRC shRNA library protocol (<http://www.broadinstitute.org/rnai/public/>),  
2 respectively. The oligo sequences were listed below: TRMT6-FWD:  
3 CCGGGGGAAAGTTCTGAGTATTTATCTCGAGATAAATACTCAGAACTTTCCCTTTTTG;  
4 TRMT6-RVS:  
5 AATTCAAAAAGGGAAAGTTCTGAGTATTTATCTCGAGATAAATACTCAGAACTTTCCC;  
6 TRMT61A-FWD:  
7 CCGGGAGGCCAGAGGCACCTTATATCTCGAGATATAAGGTGCCTCTGGCCTCTTTTTG;  
8 TRMT61A -RVS:  
9 AATTCAAAAAGAGGCCAGAGGCACCTTATATCTCGAGATATAAGGTGCCTCTGGCCTC. A  
10 scrambled shRNA was used as the mock control. Lentiviruses were packaged by co-transfecting  
11 HEK293T cells with pLKO-TRMT6, pLKO-TRMT61A, pCMV-dR8.91 and VSV-G plasmids,  
12 following the instructions from Broad Institute. The supernatants from transfected cells were  
13 harvested after 2 days and used to infect HEK293T cells followed by puromycin selection for 5  
14 days. Knock-down efficiency was verified by Western blot and qPCR. qPCR primers were listed  
15 as follows: TRMT6-qFWD: CTGTCTTTGCTGGACTTTGTGGC; TRMT6-qRVS:  
16 AGACAGCCTGAGGTTGATGACC; TRMT61A-qFWD: TCCTCTACTCCACAGACATCGC;  
17 TRMT61A-qRVS: CAATGGTGCGGATGATGGCGTG.

18

### 19 **Quantification of m<sup>1</sup>A and m<sup>6</sup>A level by LC-MS/MS**

20 200 ng isolated RNA or 100 ng model RNA oligo was digested into nucleosides by 0.5 U  
21 nuclease P1 (Sigma, N8630) in 20  $\mu$ L buffer containing 10 mM ammonium acetate, pH 5.3 at 42



1 °C for 6 h, followed by the addition of 2.5 µL 0.5 M MES buffer, pH 6.5 and 0.5 U alkaline  
2 phosphatase (Sigma, P4252). The mixture was incubated at 37 °C for another 6 h and diluted to  
3 50 µL. 5 µL of the solution was injected into LC-MS/MS. The nucleosides were separated by  
4 ultra-performance liquid chromatography on a C18 column, and then detected by triple-  
5 quadrupole mass spectrometer (AB SCIEX QTRAP 5500) in the positive ion multiple reaction-  
6 monitoring (MRM) mode. The mass transitions of m/z 282.0 to 150.1 (m<sup>1</sup>A), m/z 282.0 to 150.1  
7 (m<sup>6</sup>A), m/z 268.0 to 136.0 (A) were monitored and recorded. Concentrations of nucleosides in  
8 RNA samples were deduced by fitting the signal intensities into the stand curves.

9

#### 10 **Synthetic m<sup>1</sup>A RNA model sequences**

11 Two pairs of synthetic m<sup>1</sup>A and A RNA oligoes were used in this study. The oligo sequences were  
12 listed as follows: m<sup>1</sup>A-1: CGCGGCUCGm<sup>1</sup>AGCCCGCGUGCGGGCCUCUUUCAGGCCGCU; A-  
13 1: CGCGGCUCGAGCCCGCGUGCGGGCCUCUUUCAGGCCGCU; m<sup>1</sup>A-2:  
14 CGGCGGCCCGGGACCGm<sup>1</sup>AGACCCGGCCCCGGCUCCCC; A-2:  
15 CGGCGGCCCGGGACCGAGACCCGGCCCCGGCUCCCC. The m<sup>6</sup>A contamination in the m<sup>1</sup>A  
16 oligoes caused during the oligo purification process was measured using quantitative LC-MS/MS.  
17 The m<sup>1</sup>A RNA oligoes and A RNA oligoes were mixed at the ratio: 100%, 75%, 50%, 25%,  
18 12.5%, 6.25% and 0%, respectively. The mixed m<sup>1</sup>A /A oligoes were subjected to library  
19 construction using specific RT primers as listed:

20 RT-m<sup>1</sup>A /A-1: ACACGACGCTCTTCCGATCTagcggcctgaaagaggc;

21 RT-m<sup>1</sup>A /A-2: ACACGACGCTCTTCCGATCTggggagccggggcc.

1

## 2 **Cloning, Expression and Purification of AlkB**

3 A truncated AlkB with deletion of the N-terminal 11 amino acids was cloned into pET30a  
4 (Novagen) and transformed to *E. coli* BL21(DE3) followed by growing in LB medium at 37 °C  
5 until the OD<sub>600</sub> reached 0.6–0.8 and incubating at 30 °C for additional 4 h with the addition of 1  
6 mM IPTG. Proteins were purified using Ni-NTA chromatography (GE Healthcare) and gel-  
7 filtration chromatography (Superdex 200, GE Healthcare) followed by Mono-Q anion exchange  
8 chromatography (GE Healthcare). Such purification procedure effectively avoided RNA  
9 contamination from *E. coli*. (expression host).

10

## 11 ***In vitro* Demethylation treatment**

12 *In vitro* demethylation treatment mediated by the demethylase AlkB: 10 µg full length polyA<sup>+</sup> RNA  
13 was fragmented at 95 °C for 5 min using magnesium RNA fragmentation buffer (NEB) and  
14 fragmented polyA<sup>+</sup> RNA was desalted and concentrated by ethanol precipitation. 10 µg (~0.2  
15 nmol) fragmented polyA<sup>+</sup> RNA was denatured at 65 °C for 5 min, and then demethylated in a 500  
16 µL demethylation mixture containing 0.4 nmol purified AlkB, 50 mM MES, pH 6.5, 283 µM of  
17 (NH<sub>4</sub>)<sub>2</sub>Fe(SO<sub>4</sub>)<sub>2</sub>·6H<sub>2</sub>O, 300 µM 2-ketoglutarate, 2 mM L-ascorbic acid, 1 U/µL SUPERaseIn  
18 RNase Inhibitor (Invitrogen). The demethylation reaction was incubated for 2 h at 37 °C and  
19 quenched by the addition of 5 mM EDTA. The demethylated RNA was then purified by phenol  
20 chloroform extraction.

1 *In vitro* demethylation treatment mediated by the Dimroth rearrangement: 10 µg full length  
2 polyA<sup>+</sup> RNA was incubated in alkaline buffer (0.1 M Na<sub>2</sub>CO<sub>3</sub> /NaHCO<sub>3</sub>, 5mM EDTA, pH 10.2) at  
3 65 °C for 3 h, and then the treated RNA was purified by ethanol precipitation.

#### 4 5 **m<sup>1</sup>A-MAP**

6 40 µg polyA<sup>+</sup> RNA was fragmented into ~150 nt using magnesium RNA fragmentation buffer  
7 (NEB). m<sup>1</sup>A-containing RNA fragments were enriched by m<sup>1</sup>A immunoprecipitation as previous  
8 described (Li et al., 2016a). 10 ng (~0.2 pmol) of the immunoprecipitated m<sup>1</sup>A-containing RNA  
9 fragments were subjected to the AlkB demethylation treatment. RNA fragments were  
10 demethylated in a 20 µL demethylation mixture containing 0.4 pmol purified AlkB, 50 mM MES,  
11 pH 6.5, 283 µM of (NH<sub>4</sub>)<sub>2</sub>Fe(SO<sub>4</sub>)<sub>2</sub>·6H<sub>2</sub>O, 300 µM 2-ketoglutarate, 2 mM L-ascorbic acid, 0.4  
12 U/µL RNase inhibitor and then incubated 2 h at 37 °C. The demethylation reaction was quenched  
13 by the addition of 5 mM EDTA, and demethylated RNA was purified by phenol chloroform  
14 extraction and ethanol precipitation.

15 Fragmented polyA<sup>+</sup> RNA (as “input”), immunoprecipitated RNA [as (-) demethylase sample]  
16 and demethylated immunoprecipitated RNA [as (+) demethylase samples] were subjected to  
17 library construction. The library construction was performed according to the eCLIP library  
18 construction protocol with several modifications (Van Nostrand et al., 2016). For  
19 dephosphorylation of 3' ends, RNA samples were treated with PNK (NEB) and incubated at  
20 37 °C for 1 h and then heat-inactivation of PNK at 65 °C for 20 min. RNA samples were purified  
21 by ethanol precipitation and then subjected to 3' RNA linker ligation using T4 RNA ligase2,

1 truncated KQ (NEB) at 25 °C 2 h. The 3' RNA linker sequence was listed: 5'rAPP-  
2 AGATCGGAAGAGCGTCGTG-3SpC3. The excess RNA adaptor was digested by adding 1 µL 5'  
3 Deadenylase (NEB) into the ligation mix, incubating at 30 °C for 1 h and then adding 1 µL RecJf  
4 (NEB), incubating at 37 °C for another 1 h. These enzymes were subjected to heat-inactivation at  
5 70 °C for 20 min and RNA was purified by ethanol precipitation. RNA pellets were dissolved in 10  
6 µL H<sub>2</sub>O and then 1 µL 2 µM RT primer (ACACGACGCTCTTCCGATCT) was added. RNA-primer  
7 mix was denatured at 80 °C for 2 min and then chilling on ice. RT reaction buffer (50 mM Tri-HCl  
8 pH 8.3, 75 mM KCl, and 3 mM MgCl<sub>2</sub>, final), dNTPs (1 mM, final), DTT(5 mM, final), RNase  
9 Inhibitor (1 U/µL, final) and 1 µL TGIRT (InGex) were added into the denatured RNA-primer mix  
10 and reverse transcription was carried at 57 °C for 2 h. Excess RT primer was digested by the  
11 addition of 1 µL Exonuclease I (NEB) and incubation at 37 °C for 30 min. cDNA was purified  
12 using silane beads (Invitrogen) and then ligated to 5' adaptor (5Phos-  
13 NNNNNNNNNNAGATCGGAAGAGCACACGTCTG-3SpC3). Ligation was performed with T4  
14 RNA ligase 1, high concentration (NEB) at 25 °C overnight. The cDNA was purified using silane  
15 beads and then amplified by PCR with primers (5'-  
16 AATGATACGGCGACCACCGAGATCTACACTCTTTCCCTACACGAC GCTCTTCCGATCT-3';  
17 5'-  
18 CAAGCAGAAGACGGCATACGAGATXXXXXXGTGACTGGAGTTCAGACGTGTGCTCTTCCGA  
19 TC-3', XXXXXX represents index sequence). PCR products were purified by 8% TBE gel and  
20 sequenced on Illumina Hiseq X10 with paired-end 2×150 bp read length.

21

## 1 **Locus-specific m<sup>1</sup>A detection**

2 200 ng polyA<sup>+</sup> RNA was isolated from TRMT6/61A stable knock-down cells and mock control  
3 cells respectively, and then were fragmented into 150 nt using magnesium RNA fragmentation  
4 buffer (NEB). Fragmented RNA was ligated to 3' RNA linker and then reverse transcription was  
5 carried out with TGIRT using the same RT condition as that of m<sup>1</sup>A-MAP. The regions containing  
6 m<sup>1</sup>A were amplified by PCR using specific primers. And these amplicons from the same sample  
7 were mixed together and then subjected to DNA library construction using NEBNext® Ultra™ II  
8 DNA Library Prep Kit for Illumina® (E7645) according to the manufacturer's instructions. These  
9 libraries were deep sequenced on Illumina HiSeq X10 with paired-end 2×150 bp read length.

10 Thus, these regions of particular interest were covered with very high sequencing depth. Specific  
11 PCR primers were listed:

12 NM\_025099-m<sup>1</sup>A5643-FWD: AAAAAGCTCGGTCCGGGTTTC;

13 NM\_025099-m<sup>1</sup>A5643-RVS: TTAGCCGCAAATCACGCTG;

14 NM\_001193375-m<sup>1</sup>A978-FWD: ACACCTGTCCAAGCCCTAAT;

15 NM\_001193375-m<sup>1</sup>A978-RVS: CTGAGGGGCCCTTATTCCCA;

16 NR\_026951-m<sup>1</sup>A659-FWD: ACGTCGGCTCGTTGGTCTAG;

17 NR\_026951-m<sup>1</sup>A659-RVS: ACAGTCAAGCCTCCTGCAGC;

18 NM\_001256443-m<sup>1</sup>A486-FWD: CAAGGTTCCAGGCGAAGGG;

19 NM\_001256443-m<sup>1</sup>A486-RVS: AGCCGGGGTCTCTGTGG.

1

## 2 **siRNA Knock-down and overexpression of TRMT61B**

3 Two synthesized duplex RNAi oligoes targeting TRMT61B mRNA sequences were used: 5'-

4 GGAUAUCAACCCAGGUGAUTT-3' and 5'-GCGUGAUUCAUGGAAAUUATT-3' ; a scrambled

5 duplex RNAi oligo (5'-UCCUCCGAACGUGUCACGUTT) was used as a mock control. The

6 siRNA oligo was transfected into HEK293T by Lipofectamine RNAiMAX (Invitrogen) according to

7 the manufacturer's instructions and cells were harvested 48 h after transfection. Knockdown

8 efficiency was verified by qPCR. qPCR primers were listed as follows: TRMT61B-qFWD:

9 CAGGAGCAACCGAAGACAT; TRMT61B-qRVS:ATATACAGCACATACACCACCAT;

10 TRMT61B was cloned into pcDNA3.1 using the following primers: FWD:

11 TCGCGAAACACTATGCTAATGGC; RVS: GTTAAGTTGTGGTTTGACCTTCCTC. The empty

12 pcDNA3.1 vector was used as the mock control. The plasmid was transfected into HEK293T by

13 Lipofectamine 2000 (Invitrogen) according to the manufacturer's instructions and cells were

14 harvested 48 h after transfection.

15

## 16 **Ribosome profiling**

17 2 Plates of 15-cm HEK293T cells were grown to 90% confluency; CHX was then added to the

18 medium at a final concentration of 100 µg/mL for 7 min. The cells were then harvested and lysed

19 with 1 mL lysis buffer (10 mM Tris-HCl, pH 7.4, 5 mM MgCl<sub>2</sub>, 100 mM KCl, 1% Triton X-100, 2

20 mM DTT, 100 µg/mL CHX, 0.5 U/µL RNase inhibitor, 1×complete protease inhibitor). The cell

1 lysates were centrifuged at 15,000g for 15 min and the supernatant was collected followed by  
2 measuring the OD260 of cell lysates. 100  $\mu$ L lysates were kept as input sample and 1 mL TRIzol  
3 was added to purify the RNA. 1  $\mu$ L Micrococcal Nuclease (NEB) per 25OD was added to the  
4 remaining cell lysates and allowed to incubate at 25 °C for 20 min. The digested cell lysates were  
5 used for performing ribosome foot-printing. Lysates were fractioned on 10/50% w/v sucrose  
6 gradients using the SW-40Ti rotor at 27,500rpm for 4h. 80S monosome fractions were collected  
7 followed by the addition of equal volume of extraction buffer (1% SDS, 40 mM EDTA). RNA was  
8 isolated by phenol-chloroform extraction. RNA fragments between 28–30 nt were selected using  
9 15% Urea-PAGE. Recovered RNA fragments were subjected to library construction. In brief,  
10 RNA samples were dephosphorylated with PNK (NEB) and ligated to 3' RP linker (5'rAPP-  
11 CTGTAGGCACCATCAAT-3SpC3) using T4 RNA ligase2, truncated KQ (NEB). Reverse  
12 transcription was carried using Superscript III (Invitrogen) with RP-RT primer (5Phos-  
13 AGATCGGAAGAGCGTCGTGTAGGGAAAGAGTGTAGATCTCGGTGGTCGC-SpC18-CACTCA-  
14 SpC18-TTCAGACGTGTGCTCTTCCGATCTATTGATGGTGCCTACAG). cDNA was circ-ligated  
15 with CircLigase II (Epicentre) and then amplified by PCR with primers (5'-  
16 AATGATACGGCGACCACCGAGATCTACAC-3'; 5'-  
17 CAAGCAGAAGACGGCATACGAGATXXXXXXGTGACTGGAGTTCAGACGTGTGCTCTTCCGA  
18 TC-3', XXXXXX represents index sequence). PCR products were purified by 8% TBE gel and  
19 sequenced on Illumina Hiseq 2500 with single end reads (50 bp).

20

21 **qPCR-based m<sup>1</sup>A level evaluation**

1 20 µg polyA<sup>+</sup> RNA was isolated from HEK293T cells with TRMT61B overexpression, knock-down  
2 and the corresponding mock controls, respectively. RNA was fragmented into ~150 nt using  
3 magnesium RNA fragmentation buffer (NEB) and concentrated by ethanol precipitation.  
4 Fragmented RNA (as input) was denatured and incubated with 2 µg anti-m<sup>1</sup>A antibody in IPP  
5 buffer (150 mM NaCl, 0.1% NP-40, 10 mM Tris, pH 7.4) at 4°C overnight. 20 µL Protein A/G  
6 UltraLink Resin (Pierce) was added to the RNA antibody mixture and incubated for additional 3 h  
7 at 4°C. Resins were washed with twice with IPP buffer, once with low salt buffer (75 mM NaCl,  
8 0.1% NP-40, 10 mM Tris, pH 7.4), once with high salt buffer (200 mM NaCl, 0.1% NP-40, 10 mM  
9 Tris, pH 7.4) and twice with TEN buffer (10 mM Tris, pH 7.4, 1 mM EDTA, pH 8.0, 0.05% NP-40).  
10 m<sup>1</sup>A-containing RNA was eluted from resins with 3 mg/mL *N*<sup>1</sup>-methyladenosine  
11 (Berry&Associates) in IPP buffer and purified by phenol chloroform extraction and ethanol  
12 precipitation. Input and immunoprecipitated RNAs were reverse transcribed into cDNA using  
13 Superscript III (Invitrogen) and quantified by qPCR using SYBR GREEN mix (Takara) on Roche  
14 Lightcycler 96 real-time PCR system. The m<sup>1</sup>A-IP/input ratio of target regions in the TRMT61B  
15 overexpression, knock-down and the corresponding control samples were calculated,  
16 respectively. The primers used for qPCR were listed below:  
  
17 MT-CO1-qFWD: CCTATCATCTGTAGGCTCATTC;  
  
18 MT-CO1-qRVS: GGAGGGTTCTTCTACTATTAGGAC;  
  
19 MT-CO2-qFWD: ACAGATGCAATTCCCGGACG;  
  
20 MT-CO2-qRVS: CCACAGATTTTCAGAGCATTGACC;



- 1 MT-CO3-qFWD: CGCCTGATACTGGCATTTTG;
- 2 MT-CO3-qRVS: GACCCTCATCAATAGATGGAGAC;
- 3 MT-CYB-qFWD: CAACCCCCTAGGAATCACCTC;
- 4 MT-CYB-qRVS: GAGGGCGTCTTTGATTGTGTAG;
- 5 16S rRNA-qFWD: ATGAATGGCTCCACGAGGG;
- 6 16S rRNA-qRVS: CTTGCTGTGTTATGCCCCG.

7

## 8 **Reductive dimethylation labeling**

9 Mitochondria was isolated from TRMT61B overexpression and mock control HEK293T cell lines  
10 according to the manufacturer's (Thermo Fisher) and lysed with RIPA buffer followed by  
11 sonication. After extraction, total proteins from different cell lines were quantified with the BCA  
12 protein assay kit (Thermo Fisher). Equal amount of proteins from two cell lines were digested by  
13 trypsin on-column in 100 mM TEAB buffer and subjected to reductive dimethylation labeling. 4  $\mu$ L  
14 of 4% (w/w) light or heavy formaldehyde was added to 100  $\mu$ L of trypsin digested samples  
15 prepared from TRMT61B overexpression and mock control HEK293T cells, respectively. In the  
16 meantime, 4  $\mu$ L of 0.6 M sodium cyanoborohydride was added and the samples were incubated  
17 at room temperature for 1h. The dimethylation labeling reaction was quenched by the addition of  
18 1% (w/w) ammonia and 5% (w/w) formic acid. Finally, light and heavy labeled peptide samples  
19 were mixed, concentrated by vacuum, and analyzed on a Q Exactive mass spectrometer

1 (Thermo Fisher).

2

### 3 **LC-MS/MS and data analysis**

4 The peptides were analyzed on a Q Exactive mass spectrometer (Thermo Fisher). Under the  
5 positive-ion mode, full-scan mass spectra was acquired over the m/z range from 350 to 1800  
6 using the Orbitrap mass analyzer with mass resolution setting of 70000. MS/MS fragmentation  
7 was performed in a data-dependent mode, of which the 20 most intense ions were selected from  
8 each full-scan mass spectrum for high-energy collision induced dissociation (HCD) and MS2  
9 analysis. MS2 spectra were acquired with a resolution setting of 17500 using the Orbitrap  
10 analyzer. Some other parameters in the centroid format: isolation window, 2.0 m/z units; default  
11 charge, 2+; normalized collision energy, 28%; maximum IT, 50 ms; dynamic exclusion, 20.0 s.

12 LC-MS/MS data was analyzed by ProLuCID (Xu et al., 2015) with static modification of  
13 cysteine (+57.0215 Da) and variable oxidation of methionine (+15.9949 Da). The searching  
14 results were filtered by DTASelect (Tabb et al., 2002) and peptides were also restricted to fully  
15 tryptic with a defined peptide false positive rate of 1%. The ratios of reductive dimethylation were  
16 quantified by the CIMAGE software as described before (Weerapana et al., 2010).

17

### 18 **Pre-processing of raw sequencing data**

1 A random barcode of 10 nt was included in the adapter that ligates to the 3' end of cDNA and it  
2 cannot be precisely located in Read 1. Hence, only Read 2 data of m<sup>1</sup>A-MAP were used for  
3 subsequent analyses. Raw sequencing reads produced from m<sup>1</sup>A-MAP were firstly subjected to  
4 Trim\_galore ([http://www.bioinformatics.babraham.ac.uk/projects/trim\\_galore/](http://www.bioinformatics.babraham.ac.uk/projects/trim_galore/)) for quality control  
5 and adaptor trimming. The minimum quality threshold was set to 20, and the minimum length  
6 required for reads after trimming was 30 nt. The remaining reads were further processed by  
7 removing the first 10 nt random barcode in the 5' end. As for the ribosome profiling (Ribo-seq)  
8 data and the corresponding RNA-seq data, reads with a quality lower than 20 were discarded,  
9 and the adaptor in 3' end was trimmed. Processed reads with a length ranging from 25 nt to 35 nt  
10 in the ribosome profiling sample were kept for further analysis.

11

## 12 **Reads mapping and PCR duplication removing**

13 Processed reads were mapped to human transcriptome or mitochondrial genome using BWA-  
14 MEM with default parameters (version 0.7.15-r1140) (Li and Durbin, 2009). Reference  
15 transcriptome was prepared based on the Refseq annotation of human (hg19) downloaded from  
16 the table browser of UCSC database. The redundant sequences with the same Refseq id were  
17 removed. Transfer RNA (tRNA) sequences were also downloaded from UCSC table browser and  
18 integrated into the transcriptome. Mitochondrial genome and corresponding annotation were  
19 downloaded from NCBI (NC\_012920.1). Reads mapping to an identical position of reference  
20 were considered as PCR duplications if their 10 nt random barcodes were the same, and only

1 one of these reads was kept. Performances related to the processing of sam/bam file were done  
2 with the help of SAMtools (Li et al., 2009) (<http://samtools.sourceforge.net/>).

3

#### 4 **Identification of m<sup>1</sup>A sites**

5 Mismatch rate of each nucleotide in the reference sequences was calculated for both (-) and (+)  
6 demethylase samples. Two parameters were defined to evaluate the dynamic change of  
7 mismatch rate in the (-) demethylase and (+) demethylase samples: difference of mismatch rate  
8 (Diff) and fold change of mismatch rate (FC). Diff was calculated by subtracting the mismatch  
9 rate in the (+) demethylase from that in the (-) demethylase samples, while FC was calculated by  
10 dividing the mismatch rate in the (-) demethylase by that in the (+) demethylase sample. FC was  
11 artificially set to “1000” if the mismatch rate in the (+) demethylase sample was “0”. A position  
12 was identified as an m<sup>1</sup>A site when the following criteria were met: a)  $FC \geq 3$ ; b)  $Diff \geq 10\%$ ; c)  
13 the number of reads with a mismatch at the position was no less than 5; d) criteria (a-c) were all  
14 fulfilled in both replicates.

15 In order to evaluate the frequency of potential false positives caused by m<sup>1</sup>A-independent  
16 mismatch, we employed a reverse calling procedure. Specifically, the “opposite” calculations of  
17 Diff and FC values for each position were performed:

18  $Diff_{\text{opposite}} = (+)\text{demethylase} - (-)\text{demethylase}$ ;  $FC_{\text{opposite}} = (+)\text{demethylase}/(-)\text{demethylase}$ .

19 Under such circumstance, only 17 sites passed the above-mentioned threshold, suggesting the  
20 m<sup>1</sup>A-independent mismatch should minimally interfere with the identification of true m<sup>1</sup>A sites.

1

## 2 **Motif discovery and GO enrichment analysis**

3 For the analysis of sequence consensus, 15 nt of sequence neighboring each m<sup>1</sup>A site was  
4 retrieved. These sequences were then subjected to DREME algorithm in MEME suite (Version  
5 4.12.0) for the discovery of enriched motifs (Bailey et al., 2009). The shuffled input sequences  
6 were used as the background to eliminate potential false positives caused by the nucleotide  
7 composition.

8 Gene Ontology (GO) enrichment analyses were performed using DAVID web-based tool  
9 (<http://david.abcc.ncifcrf.gov/>) (Huang da et al., 2009).

10

## 11 **Secondary structure and minimum free energy analysis**

12 12 nucleotides of the 5' end and 10 nucleotides of the 3' end of each m<sup>1</sup>A site (hence 23 nt  
13 sequence in total) were retrieved for local structure analysis. RNAfold (v2.3.4)  
14 (<http://rna.tbi.univie.ac.at/cgi-bin/RNAfold.cgi>) was used to predict the secondary structure and  
15 calculate the corresponding minimum free energy (MFE). The length of the loop where m<sup>1</sup>A  
16 resides was determined based on the predicted structure; for an m<sup>1</sup>A site that is not located in a  
17 loop, this value was set to "0". The significance test of MFE between m<sup>1</sup>A sites within the  
18 GUUCRA motif and other m<sup>1</sup>A sites was performed using Mann-Whitney U-test.

19

## 1 **Ribosome profiling data analysis and TE calculation**

2 Ribo-seq and corresponding RNA-seq reads were aligned to the transcriptome, and RPKM  
3 (Reads Per Kilobase per Million mapped reads) of each transcript was calculated. Translation  
4 efficiency (TE) was defined for each transcript as the ratio of RPKM in Ribo-seq to RPKM in  
5 RNA-seq.

6 For the analysis of influence of m<sup>1</sup>A on mitochondrial gene translation, mitochondrial  
7 ribosome profiling data were downloaded from the GEO Datasets (GSE48933) (Rooijers et al.,  
8 2013). The depth of reads covered for each nucleotide along the mitochondrial transcripts was  
9 retrieved using Samtools depth tool.

10

## 11 **miRNA target analysis**

12 The predicted miRNA targeting sites on mitochondrial coding genes were downloaded from the  
13 miRWalk database (v2.0) (Dweep and Gretz, 2015), which depends on the match of “seed  
14 region” to gene sequence. The minimum length required for the match of seed region was set to  
15 7 nt. The experimentally identified miRNA targeting sites were retrieved from the published  
16 CLASH results (Helwak et al., 2013).

17

## 1 Figures

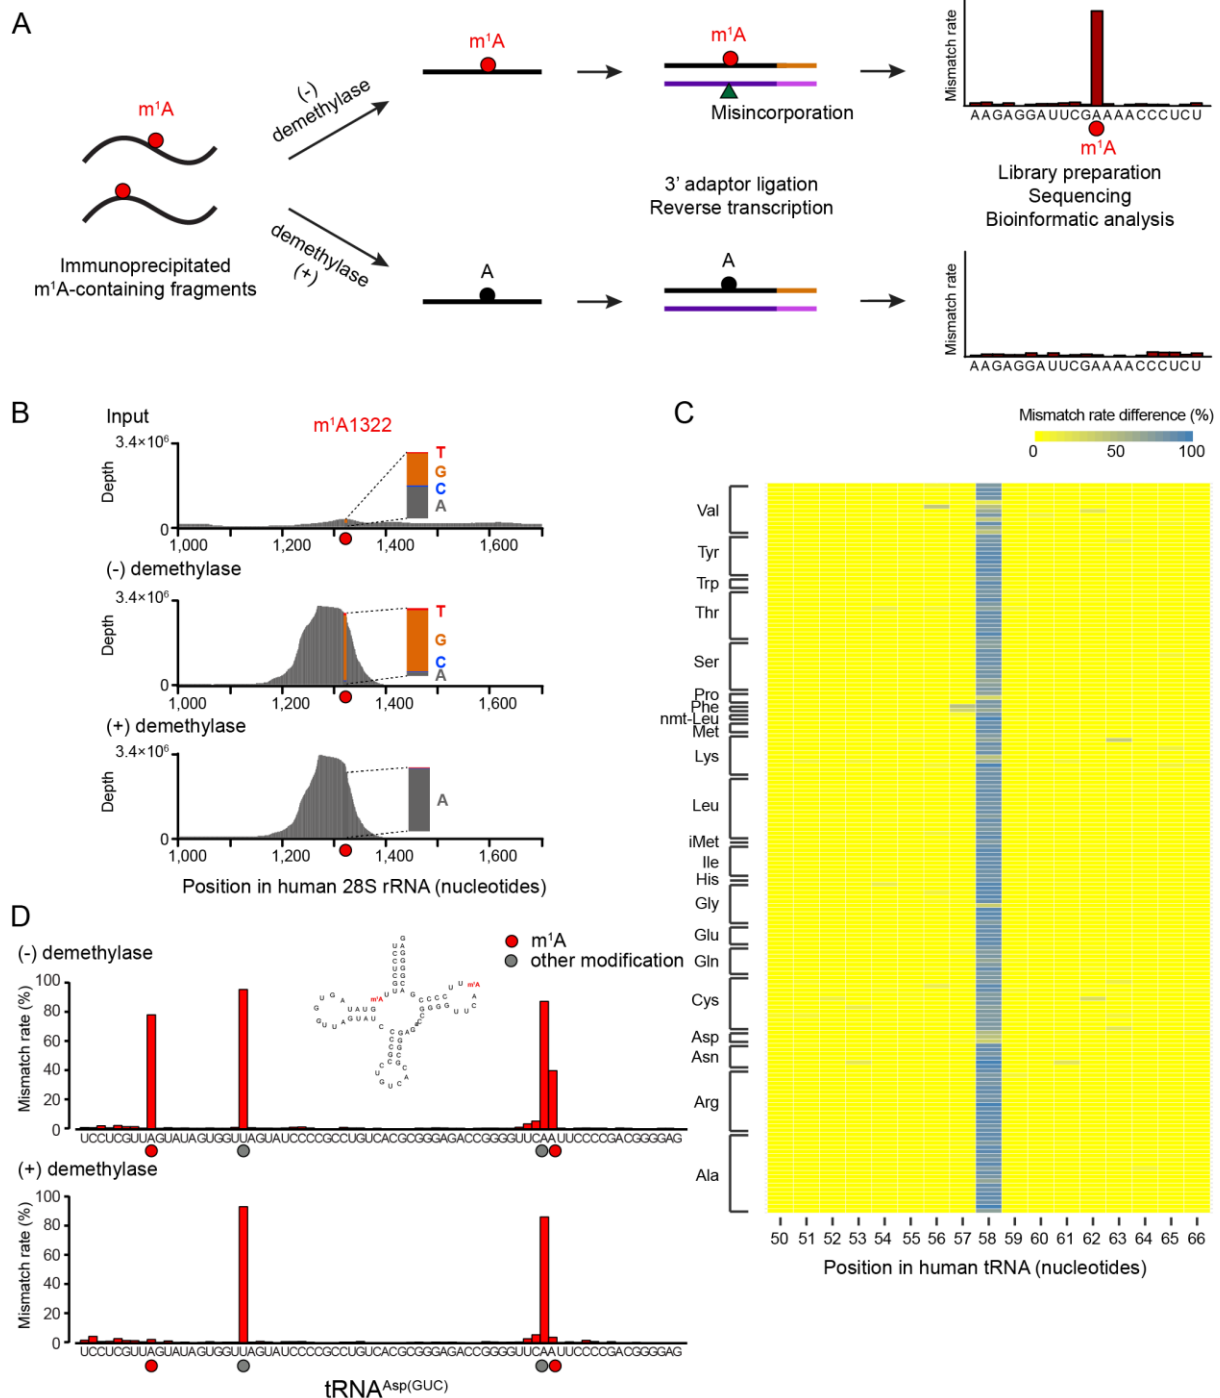

2

3 **Figure 1. m<sup>1</sup>A-MAP utilizes m<sup>1</sup>A-induced misincorporation to detect m<sup>1</sup>A sites at single-**  
 4 **nucleotide resolution.**

5 (A) Scheme of m<sup>1</sup>A-MAP. We optimized the conditions of RT so as to allow efficient

6 mismatch incorporation in cDNA synthesis. The use of an m<sup>1</sup>A antibody pre-enriches the m<sup>1</sup>A-

1 containing RNA fragments, thereby maximizing the misincorporation signal; and the use of  
2 demethylase treatment improves the confidence of detection. An m<sup>1</sup>A modification is called  
3 depending on the difference and fold change of mismatch rate between the (-) and (+)  
4 demethylase samples (see Method Details).

5 **(B)** m<sup>1</sup>A-MAP maximizes the misincorporation signal for m<sup>1</sup>A1322 on 28S rRNA.

6 **(C)** m<sup>1</sup>A-MAP detects m<sup>1</sup>A58 for the cytosolic tRNAs. Shown here is the difference of mismatch  
7 rate between the (-) and (+) demethylase samples.

8 **(D)** m<sup>1</sup>A-MAP detects a novel m<sup>1</sup>A site at position 9 in the cytosolic human tRNA<sup>Asp(GUC)</sup>. The  
9 mismatch rate for m<sup>1</sup>A58 is also reduced after demethylase treatment, while two other  
10 modifications (at position 20 and 57) are not sensitive to demethylation, representing other types  
11 of RNA modifications.

12 See also Figure S1 and S2.

13



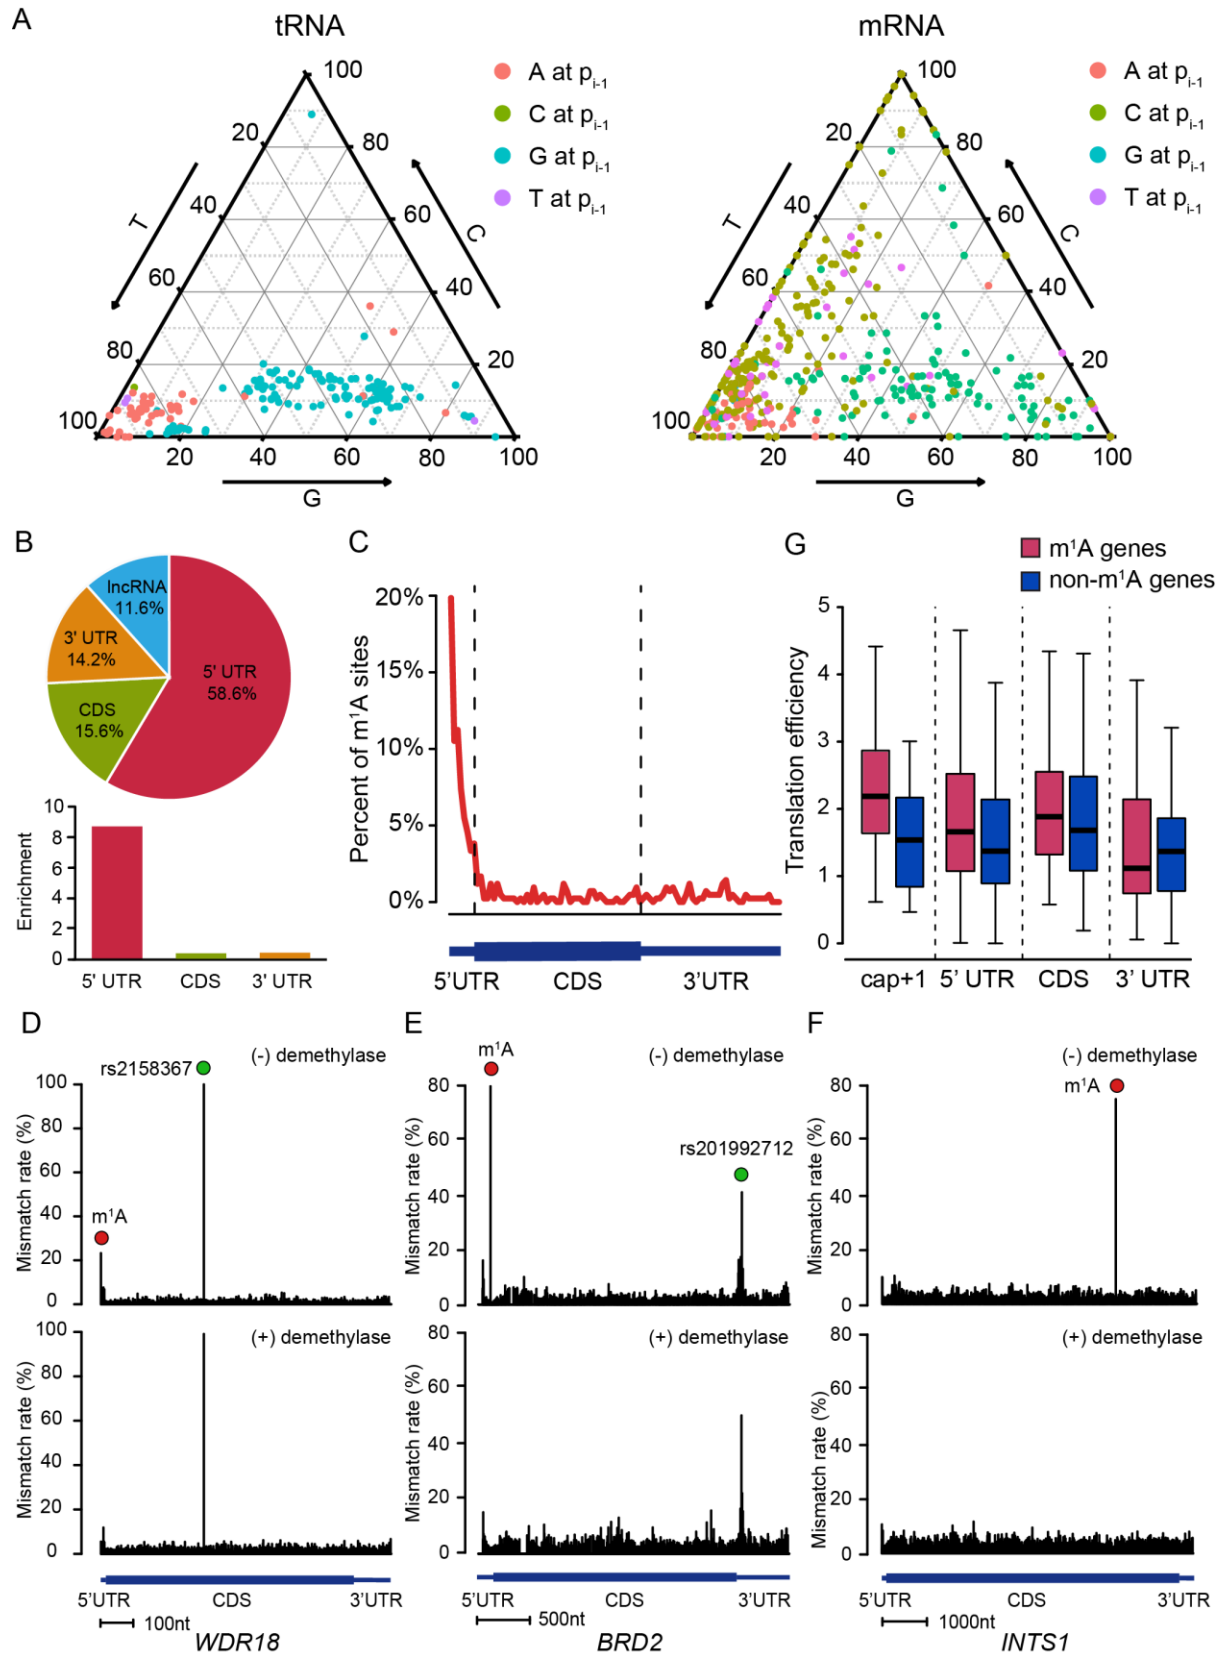

1

2

**Figure 2. Single-nucleotide resolution m<sup>1</sup>A methylome in the human transcriptome.**

1 (A) Mutation pattern of m<sup>1</sup>A sites in mRNA resembles that in tRNA. Shown here is the sequence-  
2 dependent mutation profile of m<sup>1</sup>A sites with regard to the immediate 5' nucleotide.

3 (B) The pie chart shows the percentage of m<sup>1</sup>A sites in each non-overlapping segment.

4 (C) Distribution of m<sup>1</sup>A sites across mRNA segments. Each segment was normalized according  
5 to its average length in Refseq annotation.

6 (D–F) Representative views of a typical m<sup>1</sup>A site at the cap+1 position (the first transcribed  
7 nucleotide of mRNA) of *WDR18* (D), the 5'-UTR of *BRD2* (E), and the CDS of *INTS1* mRNA (F).

8 The demethylation-insensitive signals in (D) and (E), which are indicated as green dots, are  
9 known SNPs. The scale bars are indicated at the bottom of each panel.

10 (G) m<sup>1</sup>A in the cap+1 position and 5'-UTR positively correlates with increased translation  
11 efficiency. Transcripts with comparable expression level but without m<sup>1</sup>A sites were chosen as  
12 the negative control for each category.

13 See also Figure S3.

14

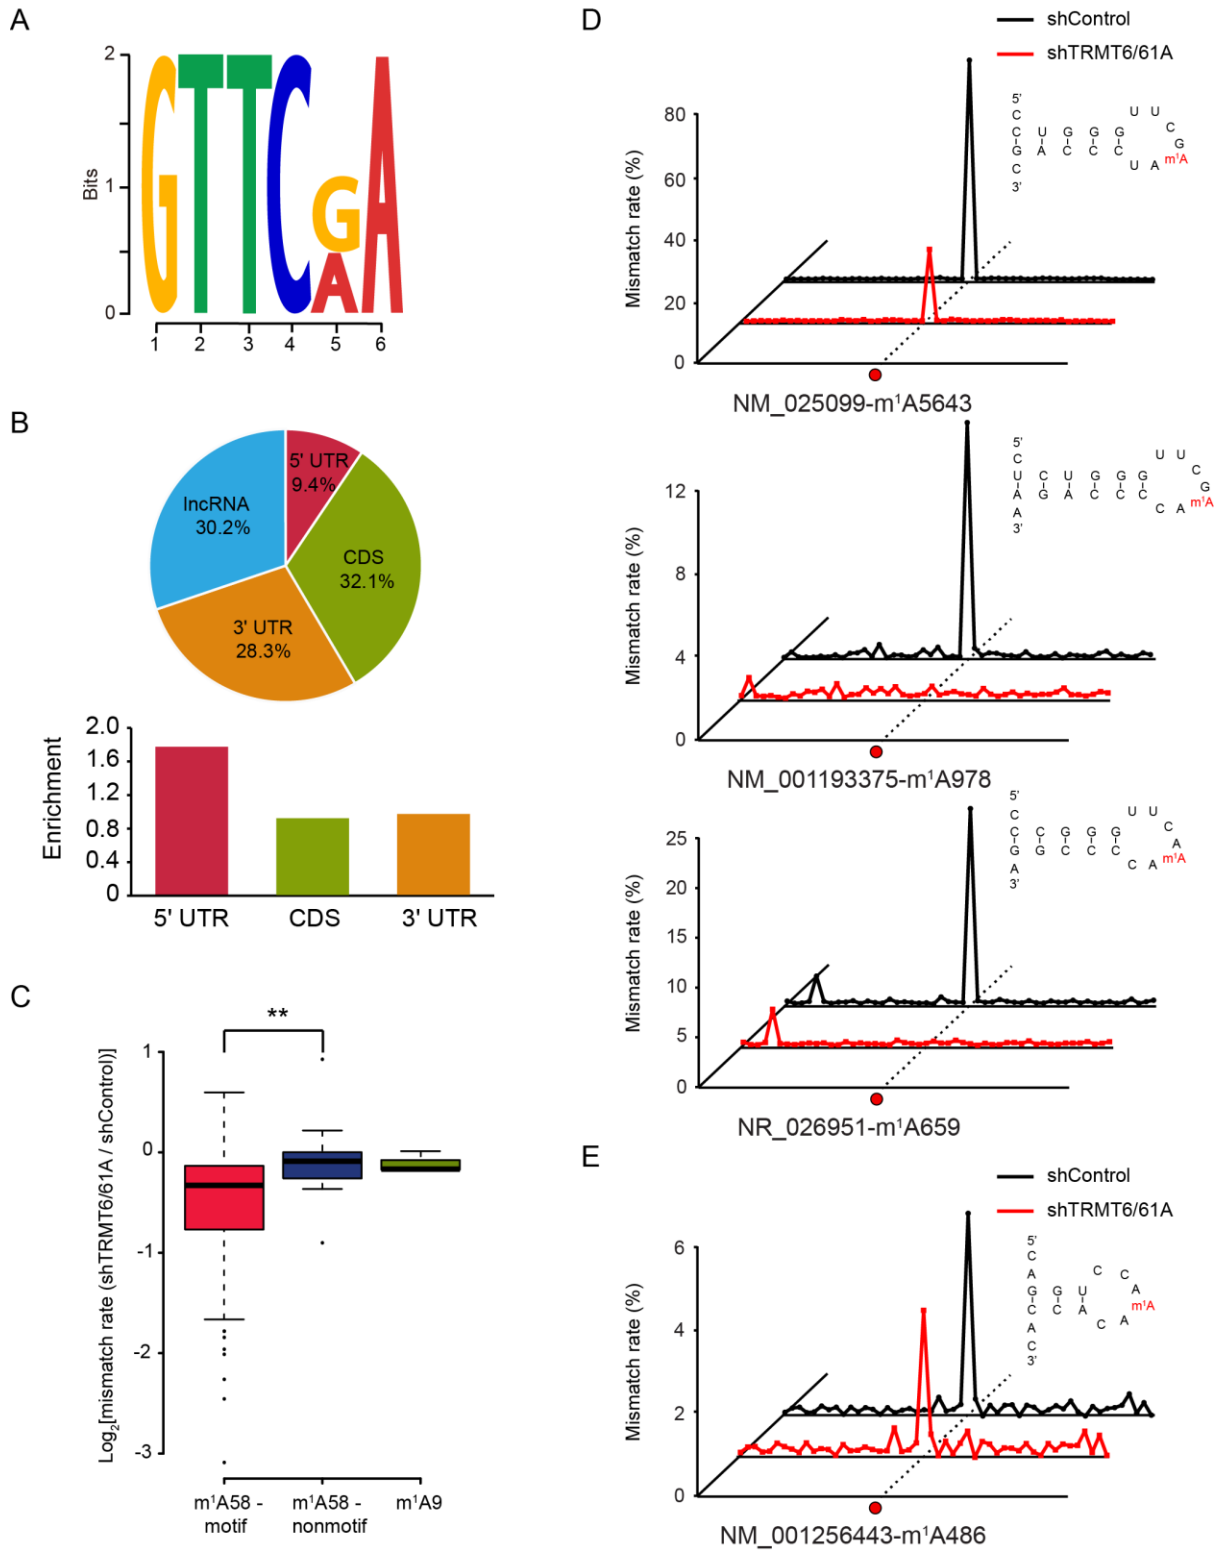

1

2 **Figure 3. The tRNA methyltransferase complex TRMT6/61A catalyzes a subset of m1A**

3 **methylation in mRNA.**

- 1 **(A)** Motif analysis revealed a GUUCRA tRNA-like consensus for a group of m<sup>1</sup>A in mRNA, E-
- 2 value=4.8e-009.
- 3 **(B)** Pie chart showing the percentage of m<sup>1</sup>A sites in each non-overlapping segment. Comparing
- 4 to the non-motif m<sup>1</sup>A sites in mRNA, these sites are evenly distributed in the transcriptome.
- 5 **(C)** TRMT6/61A specifically targets m<sup>1</sup>A within the consensus sequence, while doesn't work on
- 6 m<sup>1</sup>A in non-motif sequence of the T-loop nor m<sup>1</sup>A at the 9th position of tRNA, p-value <0.005.
- 7 **(D)** Representative views of three mRNA targets of TRMT6/61A. The predicted RNA secondary
- 8 structures are also shown, revealing a conserved stem-loop structure that harbors the GUUCRA
- 9 motif.
- 10 **(E)** An example of non-motif mRNA m<sup>1</sup>A site, showing similar mismatch rates in the control and
- 11 TRMT6/61A knock-down samples.
- 12 See also Figure S4.

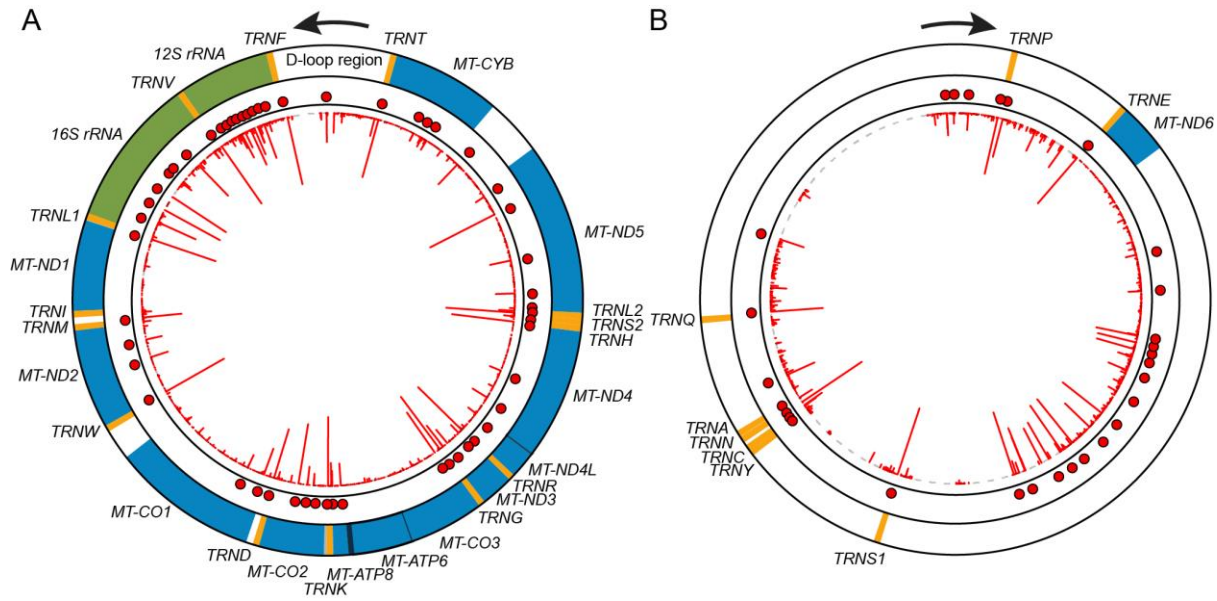

1

2 **Figure 4. Distinct m<sup>1</sup>A methylome in the mitochondrial transcriptome.**

3 (A) m<sup>1</sup>A methylome of the heavy strand. Orange, green and blue colors represent tRNA, rRNA

4 and mRNA, respectively. The red line in the inner circle represents the difference of mismatch

5 rate of individual nucleotide while each red dot represents an identified m<sup>1</sup>A site.

6 (B) m<sup>1</sup>A methylome of the light strand.

7 See also Figure S5.

8

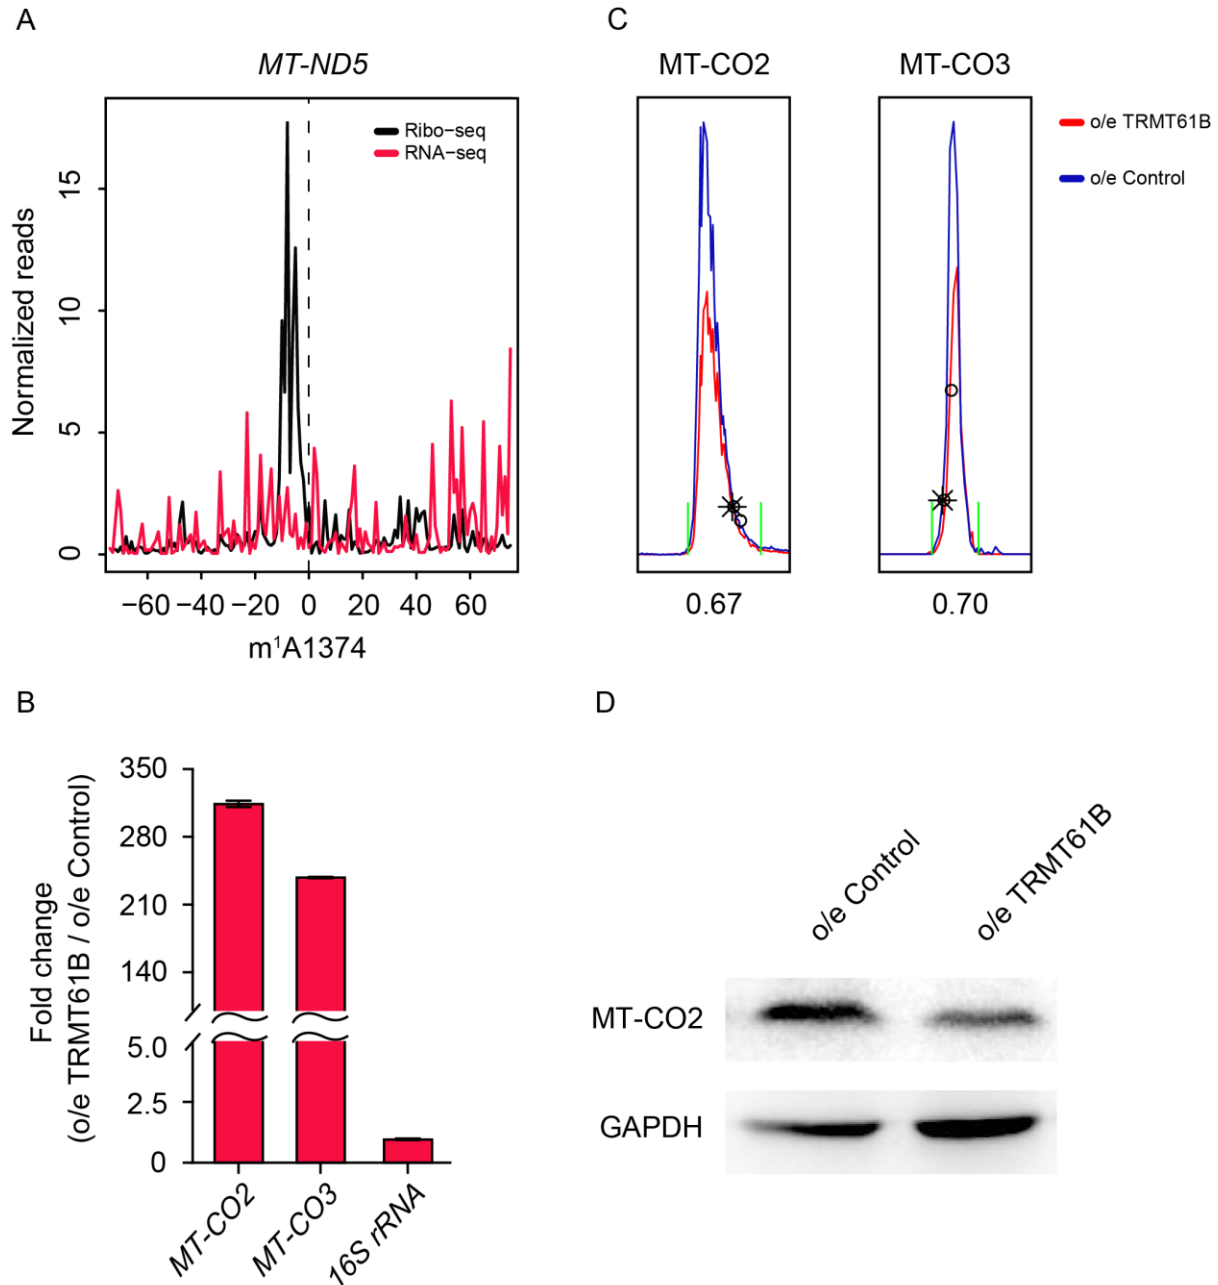

1

2 **Figure 5. m<sup>1</sup>A in the mitochondrial mRNA interferes with translation.**

3 (A) Mitochondrial ribosome stalling at the m<sup>1</sup>A site of the *MT-ND5* mRNA. The density of the 5'  
4 end of footprints was calculated for each position surrounding the m<sup>1</sup>A site. Ribosome profiling  
5 and RNA-seq data was taken from a published study (see Method Details).

6 (B) TRMT61B overexpression led to increased m<sup>1</sup>A level in *MT-CO2* and *MT-CO3* mRNA, as  
7 measured by the qPCR-based assay. Data are mean ± SD; n = 2.

- 1 (C) Extracted ion chromatograms of MT-CO2 and MT-CO3, showing decreased protein level.
- 2 (D) Western blot of MT-CO2 upon TRMT61B overexpression.
- 3 See also Figure S5.
- 4
